# Supplementary material for: Molecular insights into the response of Acidithiobacillus caldus to leached metal toxicity during bioleaching of spent FCC catalyst
Source: Research Square preprint supplement (doi:10.21203/rs.3.rs-7655028/v1), 2025-11-14
Supplement: Supplementary file 1 [file bca72b08bf903df40f675411.xlsx]

## Sheet: Low-concentration exposure 
	Gene id	MeanTPM (A)	MeanTPM (C)	log2FoldChange	pValue	qValue	result	CDD	PFAM	KEGG	eggnog	COG	GO	NR	NT
Two-component system
phoB	TR5297	63.6148	12.0982	2.39457	9.468089891809998e-129	5.07340300654e-128	up	cd17618, REC_OmpR_PhoB, phosphoacceptor receiver (REC) domain of PhoB response regulator from the OmpR family. The transcription factor PhoB is a component of the PhoR/PhoB two-component system, a key regulatory protein network that facilitates response to inorganic phosphate (Pi) starvation conditions by turning on the phosphate (pho) regulon whose products are involved in phosphorus uptake and …	pfam00072, Response_reg, Response regulator receiver domain. This domain receives the signal from the sensor partner in bacterial two-component systems. It is usually found N-terminal to a DNA binding effector domain. 7.86e-25	K07657-ko02020 Two-component system	-	COG0745, OmpR, Response regulators consisting of a CheY-like receiver domain and a winged-helix DNA-binding domain [Signal transduction mechanisms / Transcription]. 5.19e-39	-	WP_215871071.1 MULTISPECIES: phosphate regulon transcriptional regulator PhoB [unclassified Acidithiobacillus] >MBU2753488.1 phosphate regulon transcriptional regulatory protein PhoB [Acidithiobacillus sp. CV18-3] >MBU2757106.1 phosphate regulon transcriptional regulatory protein PhoB [Acidithiobacillus sp. BN09-2] >MBU2775982.1 phosphate regulon transcriptional regulatory protein PhoB [Acidithio…	Acidithiobacillus sp. YTS05 chromosome, complete genome 0.0
phoD	TR0784	15.9375	7.89285	1.01381	3.9402979490999996e-13	7.52330195902e-13	up	cd17623, REC_OmpR_CpxR, phosphoacceptor receiver (REC) domain of CpxR-like OmpR family response regulators. CpxR is part of the CpxA/CpxR two-component regulatory system that mediates envelope stress responses that is key for virulence and antibiotic resistance in several Gram negative pathogens. CpxR is a transcription factor/response regulator that controls the expression of numerous genes, inc…	pfam00072, Response_reg, Response regulator receiver domain. This domain receives the signal from the sensor partner in bacterial two-component systems. It is usually found N-terminal to a DNA binding effector domain. 6.27e-22	K01113-ko00790 Folate biosynthesis;ko02020 Two-component system	-	COG0745, OmpR, Response regulators consisting of a CheY-like receiver domain and a winged-helix DNA-binding domain [Signal transduction mechanisms / Transcription]. 1.02e-29	-	WP_226826997.1 MULTISPECIES: alkaline phosphatase D family protein [unclassified Acidithiobacillus] >UTV81640.1 alkaline phosphatase D family protein [Acidithiobacillus sp. YTS05] 0.0	Acidithiobacillus sp. YTS05 chromosome, complete genome 1.31e-13
pstS	TR0863	30.6492	10.0648	1.6065332665799998	1.1012268258099999e-50	3.6913320730599994e-50	up	cd13565, PBP2_PstS, Substrate binding domain of ABC-type phosphate transporter, a member of the type 2 periplasmic-binding fold superfamily. This subfamily contians phosphate binding domain found in PstS proteins that serve as initial receptors in the ABC transport of phosphate in eubacteria and archaea. After binding the ligand, PstS interacts with a cognate membrane transport complex comprised …	-	K02040-ko02010 ABC transporters;ko02020 Two-component system	-	COG0226, PstS, ABC-type phosphate transport system, periplasmic component [Inorganic ion transport and metabolism]. 2.65e-35	-	WP_215871111.1 MULTISPECIES: phosphate ABC transporter substrate-binding protein PstS [unclassified Acidithiobacillus] >MBU2753532.1 phosphate ABC transporter substrate-binding protein PstS [Acidithiobacillus sp. CV18-3] >MBU2757150.1 phosphate ABC transporter substrate-binding protein PstS [Acidithiobacillus sp. BN09-2] >MBU2776026.1 phosphate ABC transporter substrate-binding protein PstS [Acid…	Acidithiobacillus sp. YTS05 chromosome, complete genome 0.0
ompR	TR2669	52.9436	16.8628	1.6506121870700001	8.963944436499999e-64	3.350274233139999e-63	up	cd17623, REC_OmpR_CpxR, phosphoacceptor receiver (REC) domain of CpxR-like OmpR family response regulators. CpxR is part of the CpxA/CpxR two-component regulatory system that mediates envelope stress responses that is key for virulence and antibiotic resistance in several Gram negative pathogens. CpxR is a transcription factor/response regulator that controls the expression of numerous genes, inc…	pfam00072, Response_reg, Response regulator receiver domain. This domain receives the signal from the sensor partner in bacterial two-component systems. It is usually found N-terminal to a DNA binding effector domain. 7.68e-22	K07659-ko02026 Biofilm formation - Escherichia coli;ko02020 Two-component system	-	COG0745, OmpR, Response regulators consisting of a CheY-like receiver domain and a winged-helix DNA-binding domain [Signal transduction mechanisms / Transcription]. 1.22e-31	-	WP_215870910.1 MULTISPECIES: response regulator transcription factor [unclassified Acidithiobacillus] >MBU2753315.1 response regulator transcription factor [Acidithiobacillus sp. CV18-3] >MBU2756345.1 response regulator transcription factor [Acidithiobacillus sp. BN09-2] >MBU2776132.1 response regulator transcription factor [Acidithiobacillus sp. CV18-2] >MBU2788834.1 response regulator transcrip…	Acidithiobacillus sp. YTS05 chromosome, complete genome 0.0
Sulfur metabolism
soxX	TR5296	204.681	68.4361	1.5805512594799997	5.629786130100001e-41	1.6917648772900001e-40	up	-	-	K17223-ko00920 Sulfur metabolism	-	-	-	WP_215872257.1 MULTISPECIES: sulfur oxidation c-type cytochrome SoxX [unclassified Acidithiobacillus] >MBU2754694.1 sulfur oxidation c-type cytochrome SoxX [Acidithiobacillus sp. CV18-3] >MBU2756832.1 sulfur oxidation c-type cytochrome SoxX [Acidithiobacillus sp. BN09-2] >MBU2778492.1 sulfur oxidation c-type cytochrome SoxX [Acidithiobacillus sp. CV18-2] >MBU2788274.1 sulfur oxidation c-type cyto…	Acidithiobacillus sp. YTS05 chromosome, complete genome 2.61e-151
soxY	TR0309	83.3671	35.0868	1.24855	5.873001144969998e-60	2.13110114362e-59	up	-	pfam08770, SoxZ, Sulphur oxidation protein SoxZ. SoxZ forms an anti parallel beta structure and forms a complex with SoxY. Sulphur oxidation occurs at the thiol of a conserved cysteine residue of the SoxY subunit. 1.67e-31	K17226-ko00920 Sulfur metabolism	-	COG5501, COG5501, Predicted secreted protein [Function unknown]. 5.73e-15	-	WP_248886365.1 thiosulfate oxidation carrier protein SoxY [Acidithiobacillus sp. S30A2] 6.76e-104	Acidithiobacillus sp. YTS05 chromosome, complete genome 0.0
soxB	TR2348	8.82132	3.3489699999999996	1.39728	6.5331216206e-10	1.14034055141e-09	up	cd07411, MPP_SoxB_N, Thermus thermophilus SoxB and related proteins, N-terminal metallophosphatase domain. SoxB (sulfur oxidation protein B) is a periplasmic thiosulfohydrolase and an essential component of the sulfur oxidation pathway in archaea and bacteria. SoxB has a dinuclear manganese cluster and is thought to catalyze the release of sulfate from a protein-bound cysteine S-thiosulfonate. So…	-	K17224-ko00920 Sulfur metabolism	-	COG0737, UshA, 5'-nucleotidase/2',3'-cyclic phosphodiesterase and related esterases [Nucleotide transport and metabolism]. 1.65e-29	-	WP_215872262.1 MULTISPECIES: thiosulfohydrolase SoxB [unclassified Acidithiobacillus] >MBU2754699.1 thiosulfohydrolase SoxB [Acidithiobacillus sp. CV18-3] >MBU2756837.1 thiosulfohydrolase SoxB [Acidithiobacillus sp. BN09-2] >MBU2778487.1 thiosulfohydrolase SoxB [Acidithiobacillus sp. CV18-2] >MBU2788269.1 thiosulfohydrolase SoxB [Acidithiobacillus sp. VAN18-1] >MBU2795293.1 thiosulfohydrolase Sox…	Acidithiobacillus sp. YTS05 chromosome, complete genome 0.0
soxB	TR0501	53.0373	21.3555	1.3123996567799998	3.377302359459999e-132	1.8631243643499993e-131	up	cd07411, MPP_SoxB_N, Thermus thermophilus SoxB and related proteins, N-terminal metallophosphatase domain. SoxB (sulfur oxidation protein B) is a periplasmic thiosulfohydrolase and an essential component of the sulfur oxidation pathway in archaea and bacteria. SoxB has a dinuclear manganese cluster and is thought to catalyze the release of sulfate from a protein-bound cysteine S-thiosulfonate. So…	pfam05140, ResB, ResB-like family. This family includes both ResB and cytochrome c biogenesis proteins. Mutations in ResB indicate that they are essential for growth. ResB is predicted to be a transmembrane protein. 3.69e-10	K17224-ko00920 Sulfur metabolism	-	COG0737, UshA, 5'-nucleotidase/2',3'-cyclic phosphodiesterase and related esterases [Nucleotide transport and metabolism]. 5.63e-34	-	WP_215870990.1 MULTISPECIES: thiosulfohydrolase SoxB [unclassified Acidithiobacillus] >UTV81717.1 thiosulfohydrolase SoxB [Acidithiobacillus sp. YTS05] 0.0	Acidithiobacillus sp. YTS05 chromosome, complete genome 1.48e-108
cyc	TR2368	86.9356	0.0001	19.729587554000002	3.7557598799199984e-179	2.4149939872999995e-178	up	-	-	K08738-ko04210 Apoptosis;ko04215 Apoptosis - multiple species;ko04115 p53 signaling pathway;ko02020 Two-component system;ko00190 Oxidative phosphorylation;ko04214 Apoptosis - fly	-	COG4654, COG4654, Cytochrome c551/c552 [Energy production and conversion]. 1.50e-14	-	WP_226826882.1 MULTISPECIES: c-type cytochrome [unclassified Acidithiobacillus] >UTV82301.1 c-type cytochrome [Acidithiobacillus sp. YTS05] 8.10e-81	Acidithiobacillus sp. YTS05 chromosome, complete genome 0.0
cyc	TR0294	127.82	51.2718	1.3178817834899998	2.32724369089e-92	1.0370281126299997e-91	up	-	-	K08738-ko04210 Apoptosis;ko04215 Apoptosis - multiple species;ko04115 p53 signaling pathway;ko02020 Two-component system;ko00190 Oxidative phosphorylation;ko04214 Apoptosis - fly	-	COG4654, COG4654, Cytochrome c551/c552 [Energy production and conversion]. 1.17e-13	-	WP_226826882.1 MULTISPECIES: c-type cytochrome [unclassified Acidithiobacillus] >UTV82301.1 c-type cytochrome [Acidithiobacillus sp. YTS05] 6.23e-88	Acidithiobacillus sp. YTS05 chromosome, complete genome 0.0
sqr	TR1256	1051.6	341.596	1.62222	0	0	up	-	-	K17218-ko00920 Sulfur metabolism	-	-	-	WP_215873254.1 MULTISPECIES: FAD/NAD(P)-binding oxidoreductase [unclassified Acidithiobacillus] >MBU2755710.1 NAD(P)/FAD-dependent oxidoreductase [Acidithiobacillus sp. CV18-3] >MBU2757053.1 NAD(P)/FAD-dependent oxidoreductase [Acidithiobacillus sp. BN09-2] >MBU2778529.1 NAD(P)/FAD-dependent oxidoreductase [Acidithiobacillus sp. CV18-2] >MBU2789338.1 NAD(P)/FAD-dependent oxidoreductase [Acidithio…	Acidithiobacillus sp. YTS05 chromosome, complete genome 0.0
sqr	TR2093	99.5065	11.4336	3.12151	0	0	up	-	-	K17218-ko00920 Sulfur metabolism	-	COG1252, Ndh, NADH dehydrogenase, FAD-containing subunit [Energy production and conversion]. 1.43e-13	-	WP_255789740.1 FAD-dependent oxidoreductase [Acidithiobacillus sp. YTS05] >UTV80563.1 FAD-dependent oxidoreductase [Acidithiobacillus sp. YTS05] 2.65e-275	Acidithiobacillus sp. YTS05 chromosome, complete genome 0.0
sqr	TR1739	872.095	283.962	1.61879	7.963086941489997e-223	5.821425416889998e-222	up	-	-	K17218-ko00920 Sulfur metabolism	-	COG1252, Ndh, NADH dehydrogenase, FAD-containing subunit [Energy production and conversion]. 7.66e-15	-	ARE29958.1 sulfide:quinone oxidoreductase [Acidithiobacillus caldus] 5.10e-67	Acidithiobacillus sp. YTS05 chromosome, complete genome 0.0
sqr	TR0402	8.61701	2.31411	1.89673	1.9102440549399997e-53	6.550034087459999e-53	up	-	-	K17218-ko00920 Sulfur metabolism	-	COG1252, Ndh, NADH dehydrogenase, FAD-containing subunit [Energy production and conversion]. 2.15e-13	-	WP_255789740.1 FAD-dependent oxidoreductase [Acidithiobacillus sp. YTS05] >UTV80563.1 FAD-dependent oxidoreductase [Acidithiobacillus sp. YTS05] 5.45e-272	Acidithiobacillus sp. YTS05 chromosome, complete genome 0.0
sqr	TR0883	2317.7	296.92400000000004	2.96453	0	0	up	-	-	K17218-ko00920 Sulfur metabolism	-	COG1252, Ndh, NADH dehydrogenase, FAD-containing subunit [Energy production and conversion]. 5.69e-24	-	WP_215871096.1 MULTISPECIES: FAD-dependent oxidoreductase [unclassified Acidithiobacillus] >MBU2753516.1 FAD-dependent oxidoreductase [Acidithiobacillus sp. CV18-3] >MBU2757134.1 FAD-dependent oxidoreductase [Acidithiobacillus sp. BN09-2] >MBU2776010.1 FAD-dependent oxidoreductase [Acidithiobacillus sp. CV18-2] >MBU2788523.1 FAD-dependent oxidoreductase [Acidithiobacillus sp. VAN18-1] >MBU2795901…	Acidithiobacillus sp. YTS05 chromosome, complete genome 0.0
sqr	TR0040	96.5349	28.9454	1.73772	0	0	up	cd02556, PseudoU_synth_RluB, Pseudouridine synthase, Escherichia coli RluB like. This group is comprised of bacterial and eukaryotic proteins similar to E. coli RluB. Pseudouridine synthases catalyze the isomerization of specific uridines in an RNA molecule to pseudouridines (5-ribosyluracil, psi). No cofactors are required. E.coli RluB makes psi2605 in 23S RNA. psi2605 has been detected in eubac…	pfam04079, SMC_ScpB, Segregation and condensation complex subunit ScpB. This is a family of prokaryotic proteins that form one of the subunits, ScpB, of the segregation and condensation complex, condensin, that plays a key role in the maintenance of the chromosome. In prokaryotes the complex consists of three proteins, SMC, ScpA (kleisin) and ScpB. ScpB dimerizes and binds to ScpA. As originally …	K17218-ko00920 Sulfur metabolism	-	COG2231, COG2231, Uncharacterized protein related to Endonuclease III [DNA replication, recombination, and repair]. 4.71e-40	-	WP_215873254.1 MULTISPECIES: FAD/NAD(P)-binding oxidoreductase [unclassified Acidithiobacillus] >MBU2755710.1 NAD(P)/FAD-dependent oxidoreductase [Acidithiobacillus sp. CV18-3] >MBU2757053.1 NAD(P)/FAD-dependent oxidoreductase [Acidithiobacillus sp. BN09-2] >MBU2778529.1 NAD(P)/FAD-dependent oxidoreductase [Acidithiobacillus sp. CV18-2] >MBU2789338.1 NAD(P)/FAD-dependent oxidoreductase [Acidithio…	Acidithiobacillus sp. YTS05 chromosome, complete genome 0.0
sqr	TR0019	133.994	24.866999999999997	2.42986	0	0	up	cd04413, NDPk_I, Nucleoside diphosphate kinase Group I (NDPk_I)-like: NDP kinase domains are present in a large family of structurally and functionally conserved proteins from bacteria to humans that generally catalyze the transfer of gamma-phosphates of a nucleoside triphosphate (NTP) donor onto a nucleoside diphosphate (NDP) acceptor through a phosphohistidine intermediate. The mammalian nm23/N…	pfam00334, NDK, Nucleoside diphosphate kinase. 2.50e-51	K17218-ko00920 Sulfur metabolism	-	COG0820, COG0820, Predicted Fe-S-cluster redox enzyme [General function prediction only]. 6.65e-115	-	WP_215871096.1 MULTISPECIES: FAD-dependent oxidoreductase [unclassified Acidithiobacillus] >MBU2753516.1 FAD-dependent oxidoreductase [Acidithiobacillus sp. CV18-3] >MBU2757134.1 FAD-dependent oxidoreductase [Acidithiobacillus sp. BN09-2] >MBU2776010.1 FAD-dependent oxidoreductase [Acidithiobacillus sp. CV18-2] >MBU2788523.1 FAD-dependent oxidoreductase [Acidithiobacillus sp. VAN18-1] >MBU2795901…	Acidithiobacillus sp. YTS05 chromosome, complete genome 0.0
sor	TR0024	60.1848	22.0711	1.4472406386899999	6.292235629419998e-231	4.762983425819996e-230	up	-	pfam07682, SOR, Sulphur oxygenase reductase. The sulphur oxygenase/reductase (SOR) of the thermo-acidophilic archaeon Acidianus ambivalens is an unusual enzyme consisting of 24 identical subunits arranged in a perfectly symmetrical hollow sphere and containing a mononuclear non-heme iron centre (personal communication: A. Kletzin). At 85 degrees C in vitro, elemental sulphur is oxidized to sulphi…	K16952-ko00920 Sulfur metabolism	-	COG2303, BetA, Choline dehydrogenase and related flavoproteins [Amino acid transport and metabolism]. 5.58e-11	-	WP_215870894.1 MFS transporter [Acidithiobacillus sp. YTS05] >MBU2753299.1 MFS transporter [Acidithiobacillus sp. CV18-3] >MBU2756329.1 MFS transporter [Acidithiobacillus sp. BN09-2] >MBU2776116.1 MFS transporter [Acidithiobacillus sp. CV18-2] >MBU2788818.1 MFS transporter [Acidithiobacillus sp. VAN18-1] >MBU2795729.1 MFS transporter [Acidithiobacillus sp. VAN18-2] >MBU2798723.1 MFS transporter […	Acidithiobacillus sp. YTS05 chromosome, complete genome 0.0
sor	TR1747	975.638	201.56599999999997	2.2750929045599997	0	0	up	-	pfam07682, SOR, Sulphur oxygenase reductase. The sulphur oxygenase/reductase (SOR) of the thermo-acidophilic archaeon Acidianus ambivalens is an unusual enzyme consisting of 24 identical subunits arranged in a perfectly symmetrical hollow sphere and containing a mononuclear non-heme iron centre (personal communication: A. Kletzin). At 85 degrees C in vitro, elemental sulphur is oxidized to sulphi…	K16952-ko00920 Sulfur metabolism	-	-	-	WP_215870892.1 MULTISPECIES: sulfur oxygenase reductase family protein [unclassified Acidithiobacillus] >MBU2753297.1 sulfur oxidation protein [Acidithiobacillus sp. CV18-3] >MBU2756327.1 sulfur oxidation protein [Acidithiobacillus sp. BN09-2] >MBU2776114.1 sulfur oxidation protein [Acidithiobacillus sp. CV18-2] >MBU2788816.1 sulfur oxidation protein [Acidithiobacillus sp. VAN18-1] >MBU2795727.1 …	Acidithiobacillus sp. YTS05 chromosome, complete genome 0.0
sor	TR0668	1118.57	314.194	1.8319254277900001	0	0	up	-	pfam07682, SOR, Sulphur oxygenase reductase. The sulphur oxygenase/reductase (SOR) of the thermo-acidophilic archaeon Acidianus ambivalens is an unusual enzyme consisting of 24 identical subunits arranged in a perfectly symmetrical hollow sphere and containing a mononuclear non-heme iron centre (personal communication: A. Kletzin). At 85 degrees C in vitro, elemental sulphur is oxidized to sulphi…	K16952-ko00920 Sulfur metabolism	-	-	-	WP_215870892.1 MULTISPECIES: sulfur oxygenase reductase family protein [unclassified Acidithiobacillus] >MBU2753297.1 sulfur oxidation protein [Acidithiobacillus sp. CV18-3] >MBU2756327.1 sulfur oxidation protein [Acidithiobacillus sp. BN09-2] >MBU2776114.1 sulfur oxidation protein [Acidithiobacillus sp. CV18-2] >MBU2788816.1 sulfur oxidation protein [Acidithiobacillus sp. VAN18-1] >MBU2795727.1 …	Acidithiobacillus sp. YTS05 chromosome, complete genome 0.0
cysJ	TR2439	9.61538	3.15974	1.60554	8.476009363560001e-06	1.28125722938e-05	up	cd06199, SiR, Cytochrome p450- like alpha subunits of E. coli sulfite reductase (SiR) multimerize with beta subunits to catalyze the NADPH dependent reduction of sulfite to sulfide. Beta subunits have an Fe4S4 cluster and a siroheme, while the alpha subunits (cysJ gene) are of the cytochrome p450 (CyPor) family having FAD and FMN as prosthetic groups and utilizing NADPH. Cypor (including cyt -450…	-	K00380-ko00920 Sulfur metabolism	-	COG0369, CysJ, Sulfite reductase, alpha subunit (flavoprotein) [Inorganic ion transport and metabolism]. 6.01e-27	-	WP_215870761.1 MULTISPECIES: flavodoxin domain-containing protein [unclassified Acidithiobacillus] >MBU2753164.1 Rieske 2Fe-2S domain-containing protein [Acidithiobacillus sp. CV18-3] >MBU2756688.1 Rieske 2Fe-2S domain-containing protein [Acidithiobacillus sp. BN09-2] >MBU2776573.1 Rieske 2Fe-2S domain-containing protein [Acidithiobacillus sp. CV18-2] >MBU2788101.1 Rieske 2Fe-2S domain-containing…	Acidithiobacillus sp. YTS05 chromosome, complete genome 0.0
cysM	TR0387	44.7642	17.6131	1.3456965499200002	4.343496207689998e-129	2.331607479529999e-128	up	cd01561, CBS_like, CBS_like: This subgroup includes Cystathionine beta-synthase (CBS) and Cysteine synthase. CBS is a unique heme-containing enzyme that catalyzes a pyridoxal 5'-phosphate (PLP)-dependent condensation of serine and homocysteine to give cystathionine. Deficiency of CBS leads to homocystinuria, an inherited disease of sulfur metabolism characterized by increased levels of the toxic …	pfam01988, VIT1, VIT family. This family includes the vacuolar Fe2+/Mn2+ uptake transporter, Ccc1 and the vacuolar iron transporter VIT1. 5.48e-24	K12339-ko00270 Cysteine and methionine metabolism	-	COG0031, CysK, Cysteine synthase [Amino acid transport and metabolism]. 2.98e-67	-	WP_215871549.1 MULTISPECIES: hypothetical protein [unclassified Acidithiobacillus] >MBU2753972.1 hypothetical protein [Acidithiobacillus sp. CV18-3] >MBU2756200.1 hypothetical protein [Acidithiobacillus sp. BN09-2] >MBU2778645.1 hypothetical protein [Acidithiobacillus sp. CV18-2] >MBU2786898.1 hypothetical protein [Acidithiobacillus sp. VAN18-1] >MBU2797212.1 hypothetical protein [Acidithiobacill…	Acidithiobacillus sp. YTS05 chromosome, complete genome 0.0
cysM	TR2226	176.27	64.8881	1.4417611303600002	1.8199863052199997e-107	8.935564946819998e-107	up	cd01561, CBS_like, CBS_like: This subgroup includes Cystathionine beta-synthase (CBS) and Cysteine synthase. CBS is a unique heme-containing enzyme that catalyzes a pyridoxal 5'-phosphate (PLP)-dependent condensation of serine and homocysteine to give cystathionine. Deficiency of CBS leads to homocystinuria, an inherited disease of sulfur metabolism characterized by increased levels of the toxic …	pfam00291, PALP, Pyridoxal-phosphate dependent enzyme. Members of this family are all pyridoxal-phosphate dependent enzymes. This family includes: serine dehydratase EC:4.2.1.13 P20132, threonine dehydratase EC:4.2.1.16, tryptophan synthase beta chain EC:4.2.1.20, threonine synthase EC:4.2.99.2, cysteine synthase EC:4.2.99.8 P11096, cystathionine beta-synthase EC:4.2.1.22, 1-aminocyclopropane-1-c…	K12339-ko00270 Cysteine and methionine metabolism	-	COG0031, CysK, Cysteine synthase [Amino acid transport and metabolism]. 4.25e-71	-	WP_215871548.1 MULTISPECIES: cysteine synthase CysM [unclassified Acidithiobacillus] >MBU2753971.1 cysteine synthase CysM [Acidithiobacillus sp. CV18-3] >MBU2756199.1 cysteine synthase CysM [Acidithiobacillus sp. BN09-2] >MBU2778644.1 cysteine synthase CysM [Acidithiobacillus sp. CV18-2] >MBU2786897.1 cysteine synthase CysM [Acidithiobacillus sp. VAN18-1] >MBU2797211.1 cysteine synthase CysM [Aci…	Acidithiobacillus sp. YTS05 chromosome, complete genome 0.0
soeC	TR1670	0.0001	8.68179	-16.4057	7.285802576029999e-80	3.046790168159999e-79	down	-	-	K21309-ko00920 Sulfur metabolism	-	COG2896, MoaA, Molybdenum cofactor biosynthesis enzyme [Coenzyme metabolism]. 6.54e-23	-	WP_215872249.1 MULTISPECIES: dimethyl sulfoxide reductase anchor subunit [unclassified Acidithiobacillus] >MBU2754686.1 dimethyl sulfoxide reductase anchor subunit [Acidithiobacillus sp. CV18-3] >MBU2756824.1 dimethyl sulfoxide reductase anchor subunit [Acidithiobacillus sp. BN09-2] >MBU2778500.1 dimethyl sulfoxide reductase anchor subunit [Acidithiobacillus sp. CV18-2] >MBU2788282.1 dimethyl sul…	Acidithiobacillus sp. YTS05 chromosome, complete genome 0.0
Oxidative phosphorylation
nuoF	TR2533	2.29158	0.0001	14.4841	1.41714271624e-37	4.0742853092e-37	up	cd03081, TRX_Fd_NuoE_FDH_gamma, TRX-like [2Fe-2S] Ferredoxin (Fd) family, NADH:ubiquinone oxidoreductase (Nuo) subunit E subfamily, NAD-dependent formate dehydrogenase (FDH) gamma subunit; composed of proteins similar to the gamma subunit of NAD-linked FDH of Ralstonia eutropha, a soluble enzyme that catalyzes the irreversible oxidation of formate to carbon dioxide accompanied by the reduction of…	pfam00346, Complex1_49kDa, Respiratory-chain NADH dehydrogenase, 49 Kd subunit. 4.16e-52	K00335-ko00190 Oxidative phosphorylation	-	COG1894, NuoF, NADH:ubiquinone oxidoreductase, NADH-binding (51 kD) subunit [Energy production and conversion]. 2.77e-78	-	WP_226827833.1 MULTISPECIES: NADH-ubiquinone oxidoreductase-F iron-sulfur binding region domain-containing protein [unclassified Acidithiobacillus] >UTV80644.1 SLBB domain-containing protein [Acidithiobacillus sp. YTS05] 2.99e-215	Acidithiobacillus sp. YTS05 chromosome, complete genome 0.0
nuoG	TR1560	546.447	99.0824	2.46338	0	0	up	-	pfam10588, NADH-G_4Fe-4S_3, NADH-ubiquinone oxidoreductase-G iron-sulfur binding region. 1.30e-06	K00336-ko00190 Oxidative phosphorylation	-	COG1034, NuoG, NADH dehydrogenase/NADH:ubiquinone oxidoreductase 75 kD subunit (chain G) [Energy production and conversion]. 8.15e-31	-	WP_215873069.1 MULTISPECIES: 2Fe-2S iron-sulfur cluster-binding protein [unclassified Acidithiobacillus] >MBU2755526.1 2Fe-2S iron-sulfur cluster binding domain-containing protein [Acidithiobacillus sp. CV18-3] >MBU2757803.1 2Fe-2S iron-sulfur cluster binding domain-containing protein [Acidithiobacillus sp. BN09-2] >MBU2777932.1 2Fe-2S iron-sulfur cluster binding domain-containing protein [Acidit…	Acidithiobacillus sp. YTS05 chromosome, complete genome 0.0
nuoG	TR2403	103.996	9.60727	3.4362590827699995	0	0	up	cd02771, MopB_NDH-1_NuoG2-N7, MopB_NDH-1_NuoG2-N7: The second domain of the NuoG subunit (with a [4Fe-4S] cluster, N7) of the NADH-quinone oxidoreductase/NADH dehydrogenase-1 (NDH-1) found in various bacteria. The NDH-1 is the first energy-transducting complex in the respiratory chain and functions as a redox pump that uses the redox energy to translocate H+ ions across the membrane, resulting in…	-	K00336-ko00190 Oxidative phosphorylation	-	COG1034, NuoG, NADH dehydrogenase/NADH:ubiquinone oxidoreductase 75 kD subunit (chain G) [Energy production and conversion]. 3.95e-15	-	WP_215873069.1 MULTISPECIES: 2Fe-2S iron-sulfur cluster-binding protein [unclassified Acidithiobacillus] >MBU2755526.1 2Fe-2S iron-sulfur cluster binding domain-containing protein [Acidithiobacillus sp. CV18-3] >MBU2757803.1 2Fe-2S iron-sulfur cluster binding domain-containing protein [Acidithiobacillus sp. BN09-2] >MBU2777932.1 2Fe-2S iron-sulfur cluster binding domain-containing protein [Acidit…	Acidithiobacillus sp. YTS05 chromosome, complete genome 0.0
nuoH	TR2286	46.807	15.715	1.57458	2.7418522453e-52	9.305491729219999e-52	up	-	pfam00146, NADHdh, NADH dehydrogenase. 7.14e-30	K00337-ko00190 Oxidative phosphorylation	-	COG1005, NuoH, NADH:ubiquinone oxidoreductase subunit 1 (chain H) [Energy production and conversion]. 3.11e-28	-	WP_255789749.1 NADH-quinone oxidoreductase subunit NuoH [Acidithiobacillus sp. YTS05] >UTV80646.1 NADH-quinone oxidoreductase subunit NuoH [Acidithiobacillus sp. YTS05] 3.31e-101	Acidithiobacillus sp. YTS05 chromosome, complete genome 0.0
nuoL	TR0140	53.3743	22.662	1.23587	0	0	up	cd02771, MopB_NDH-1_NuoG2-N7, MopB_NDH-1_NuoG2-N7: The second domain of the NuoG subunit (with a [4Fe-4S] cluster, N7) of the NADH-quinone oxidoreductase/NADH dehydrogenase-1 (NDH-1) found in various bacteria. The NDH-1 is the first energy-transducting complex in the respiratory chain and functions as a redox pump that uses the redox energy to translocate H+ ions across the membrane, resulting in…	pfam00346, Complex1_49kDa, Respiratory-chain NADH dehydrogenase, 49 Kd subunit. 5.34e-67	K00341-ko00190 Oxidative phosphorylation	-	COG0649, NuoD, NADH:ubiquinone oxidoreductase 49 kD subunit 7 [Energy production and conversion]. 5.84e-109	-	WP_215873069.1 MULTISPECIES: 2Fe-2S iron-sulfur cluster-binding protein [unclassified Acidithiobacillus] >MBU2755526.1 2Fe-2S iron-sulfur cluster binding domain-containing protein [Acidithiobacillus sp. CV18-3] >MBU2757803.1 2Fe-2S iron-sulfur cluster binding domain-containing protein [Acidithiobacillus sp. BN09-2] >MBU2777932.1 2Fe-2S iron-sulfur cluster binding domain-containing protein [Acidit…	Acidithiobacillus sp. YTS05 chromosome, complete genome 0.0
nuoN	TR4841	1.93693	0.5959439999999999	1.70052	0.020232289553599996	0.025407201077400004	up	-	-	K00343-ko00190 Oxidative phosphorylation	-	-	-	WP_215873075.1 MULTISPECIES: proton-conducting transporter membrane subunit [unclassified Acidithiobacillus] >MBU2755533.1 NADH-quinone oxidoreductase subunit N [Acidithiobacillus sp. CV18-3] >MBU2757796.1 NADH-quinone oxidoreductase subunit N [Acidithiobacillus sp. BN09-2] >MBU2777939.1 NADH-quinone oxidoreductase subunit N [Acidithiobacillus sp. CV18-2] >MBU2787769.1 NADH-quinone oxidoreductase…	Acidithiobacillus sp. YTS05 chromosome, complete genome 0.0
Nitrogen metabolism
nrt	TR2240	13.4596	2.26648	2.57011	6.56320666375e-49	2.1756084173599997e-48	up	cd17341, MFS_NRT2_like, Plant Nitrate transporter NRT2 family and Bacterial Nitrate/Nitrite transporters of the Major Facilitator Superfamily. This family is composed of plant NRT2 family high-affinity nitrate transporters as well as nitrate and nitrite transporters from bacteria including Bacillus subtilis nitrate transporter NasA and nitrite extrusion protein NarK, Staphylococcus aureus NarT, S…	-	K02575-ko00910 Nitrogen metabolism	-	COG2223, NarK, Nitrate/nitrite transporter [Inorganic ion transport and metabolism]. 1.72e-14	-	WP_215872447.1 MULTISPECIES: MFS transporter [unclassified Acidithiobacillus] >MBU2754887.1 NarK/NasA family nitrate transporter [Acidithiobacillus sp. CV18-3] >MBU2756565.1 NarK/NasA family nitrate transporter [Acidithiobacillus sp. BN09-2] >MBU2777183.1 NarK/NasA family nitrate transporter [Acidithiobacillus sp. CV18-2] >MBU2786647.1 NarK/NasA family nitrate transporter [Acidithiobacillus sp. V…	Acidithiobacillus sp. YTS05 chromosome, complete genome 0.0
glnA	TR0958	15.4439	3.8060699999999996	2.02067	8.39045386185e-23	1.94025189845e-22	up	-	pfam00120, Gln-synt_C, Glutamine synthetase, catalytic domain. 9.20e-77	K01915-ko00910 Nitrogen metabolism;ko04724 Glutamatergic synapse;ko04727 GABAergic synapse;ko00220 Arginine biosynthesis;ko00630 Glyoxylate and dicarboxylate metabolism;ko02020 Two-component system;ko04217 Necroptosis;ko00250 Alanine, aspartate and glutamate metabolism	-	COG0174, GlnA, Glutamine synthetase [Amino acid transport and metabolism]. 5.49e-73	-	WP_255790320.1 glutamate--ammonia ligase [Acidithiobacillus sp. YTS05] >UTV82380.1 glutamate--ammonia ligase [Acidithiobacillus sp. YTS05] 9.34e-168	Acidithiobacillus sp. YTS05 chromosome, complete genome 0.0
glnA	TR0527	90.8334	26.0775	1.8004173151299998	1.2144120673699993e-254	9.975527696289995e-254	up	-	pfam00120, Gln-synt_C, Glutamine synthetase, catalytic domain. 8.70e-110	K01915-ko00910 Nitrogen metabolism;ko04724 Glutamatergic synapse;ko04727 GABAergic synapse;ko00220 Arginine biosynthesis;ko00630 Glyoxylate and dicarboxylate metabolism;ko02020 Two-component system;ko04217 Necroptosis;ko00250 Alanine, aspartate and glutamate metabolism	-	COG0174, GlnA, Glutamine synthetase [Amino acid transport and metabolism]. 4.96e-127	-	WP_255790320.1 glutamate--ammonia ligase [Acidithiobacillus sp. YTS05] >UTV82380.1 glutamate--ammonia ligase [Acidithiobacillus sp. YTS05] 0.0	Acidithiobacillus sp. YTS05 chromosome, complete genome 0.0
gltB	TR0771	104.039	26.9884	1.9467116962400002	0	0	up	cd00713, GltS, Glutamine amidotransferases class-II (Gn-AT), glutamate synthase (GltS)-type. GltS is a homodimer that synthesizes L-glutamate from 2-oxoglutarate and L-glutamine, an important step in ammonia assimilation in bacteria, cyanobacteria and plants. The N-terminal glutaminase domain catalyzes the hydrolysis of glutamine to glutamic acid and ammonia, and has a fold similar to that of oth…	pfam00310, GATase_2, Glutamine amidotransferases class-II. 7.93e-132	K00265-ko00910 Nitrogen metabolism;ko00250 Alanine, aspartate and glutamate metabolism	-	COG0067, GltB, Glutamate synthase domain 1 [Amino acid transport and metabolism]. 2.84e-104	-	WP_215871122.1 MULTISPECIES: glutamate synthase large subunit [unclassified Acidithiobacillus] >MBU2753547.1 glutamate synthase large subunit [Acidithiobacillus sp. CV18-3] >MBU2757380.1 glutamate synthase large subunit [Acidithiobacillus sp. BN09-2] >MBU2776041.1 glutamate synthase large subunit [Acidithiobacillus sp. CV18-2] >MBU2788554.1 glutamate synthase large subunit [Acidithiobacillus sp. …	Acidithiobacillus sp. YTS05 chromosome, complete genome 0.0
gltB	TR2728	60.4316	10.3858	2.54069	1.1588415011099997e-110	5.794207505539999e-110	up	cd00982, gltB_C, gltb_C. This domain is found at the C-terminus of the large subunit (gltB) of glutamate synthase (GltS). GltS encodes a complex iron-sulfur flavoprotein that catalyzes the synthesis of L-glutamate from L-glutamine and 2-oxoglutarate. It requires the transfer of ammonia and electrons among three distinct active centers that carry out L-Gln hydrolysis, conversion of 2-oxoglutarate …	pfam01493, GXGXG, GXGXG motif. This domain is found in glutamate synthase, tungsten formylmethanofuran dehydrogenase subunit c (FwdC) and molybdenum formylmethanofuran dehydrogenase subunit c (FmdC). A repeated G-XX-G-XXX-G motif is seen in the alignment. 4.45e-58	K00265-ko00910 Nitrogen metabolism;ko00250 Alanine, aspartate and glutamate metabolism	-	COG0070, GltB, Glutamate synthase domain 3 [Amino acid transport and metabolism]. 2.94e-50	-	WP_215871122.1 MULTISPECIES: glutamate synthase large subunit [unclassified Acidithiobacillus] >MBU2753547.1 glutamate synthase large subunit [Acidithiobacillus sp. CV18-3] >MBU2757380.1 glutamate synthase large subunit [Acidithiobacillus sp. BN09-2] >MBU2776041.1 glutamate synthase large subunit [Acidithiobacillus sp. CV18-2] >MBU2788554.1 glutamate synthase large subunit [Acidithiobacillus sp. …	Acidithiobacillus sp. YTS05 chromosome, complete genome 0.0
Glutathione metabolism
gshA	TR0050	34.7898	9.46004	1.8787461963499998	3.331978179079998e-271	2.921587904819999e-270	up	cd06112, citrate_synt_like_1_1, Citrate synthase (CS) catalyzes the condensation of acetyl coenzyme A (AcCoA) and oxalacetate (OAA) to form citrate and coenzyme A (CoA), the first step in the oxidative citric acid cycle (TCA or Krebs cycle). Peroxisomal CS is involved in the glyoxylate cycle. This group also includes CS proteins which functions as a 2-methylcitrate synthase (2MCS). 2MCS catalyzes…	pfam08886, GshA, Glutamate-cysteine ligase. This is a rare family of glutamate--cysteine ligases, EC:6.3.2.2, demonstrated first in Thiobacillus ferrooxidans and present in a few other Proteobacteria. It is the first of two enzymes for glutathione biosynthesis. It is also called gamma-glutamylcysteine synthetase. The structure of this family has been solved, and is similar to that of human glutat…	K01919-ko00480 Glutathione metabolism;ko00270 Cysteine and methionine metabolism	-	COG0372, GltA, Citrate synthase [Energy production and conversion]. 7.30e-93	-	WP_215872095.1 MULTISPECIES: glutamate--cysteine ligase [unclassified Acidithiobacillus] >MBU2754522.1 glutamate--cysteine ligase [Acidithiobacillus sp. CV18-3] >MBU2758201.1 glutamate--cysteine ligase [Acidithiobacillus sp. BN09-2] >MBU2776358.1 glutamate--cysteine ligase [Acidithiobacillus sp. CV18-2] >MBU2787545.1 glutamate--cysteine ligase [Acidithiobacillus sp. VAN18-1] >MBU2797560.1 glutama…	Acidithiobacillus sp. YTS05 chromosome, complete genome 0.0
gshA	TR2728	60.4316	10.3858	2.54069	1.1588415011099997e-110	5.794207505539999e-110	up	cd00982, gltB_C, gltb_C. This domain is found at the C-terminus of the large subunit (gltB) of glutamate synthase (GltS). GltS encodes a complex iron-sulfur flavoprotein that catalyzes the synthesis of L-glutamate from L-glutamine and 2-oxoglutarate. It requires the transfer of ammonia and electrons among three distinct active centers that carry out L-Gln hydrolysis, conversion of 2-oxoglutarate …	pfam01493, GXGXG, GXGXG motif. This domain is found in glutamate synthase, tungsten formylmethanofuran dehydrogenase subunit c (FwdC) and molybdenum formylmethanofuran dehydrogenase subunit c (FmdC). A repeated G-XX-G-XXX-G motif is seen in the alignment. 4.45e-58	K00265-ko00910 Nitrogen metabolism;ko00250 Alanine, aspartate and glutamate metabolism	-	COG0070, GltB, Glutamate synthase domain 3 [Amino acid transport and metabolism]. 2.94e-50	-	WP_215871122.1 MULTISPECIES: glutamate synthase large subunit [unclassified Acidithiobacillus] >MBU2753547.1 glutamate synthase large subunit [Acidithiobacillus sp. CV18-3] >MBU2757380.1 glutamate synthase large subunit [Acidithiobacillus sp. BN09-2] >MBU2776041.1 glutamate synthase large subunit [Acidithiobacillus sp. CV18-2] >MBU2788554.1 glutamate synthase large subunit [Acidithiobacillus sp. …	Acidithiobacillus sp. YTS05 chromosome, complete genome 0.0
gsr	TR0262	47.6272	23.479	1.0204132571100002	1.3507865217799997e-56	4.746006698129999e-56	up	cd09010, MTAP_SsMTAPII_like_MTIP, 5'-deoxy-5'-methylthioadenosine phosphorylases (MTAP) similar to Sulfolobus solfataricus MTAPII and Pseudomonas aeruginosa PAO1 5'-methylthioinosine phosphorylase (MTIP). MTAP catalyzes the reversible phosphorolysis of 5'-deoxy-5'-methylthioadenosine (MTA) to adenine and 5-methylthio-D-ribose-1-phosphate. This subfamily includes human MTAP which is highly specifi…	pfam07992, Pyr_redox_2, Pyridine nucleotide-disulphide oxidoreductase. This family includes both class I and class II oxidoreductases and also NADH oxidases and peroxidases. This domain is actually a small NADH binding domain within a larger FAD binding domain. 3.41e-15	K00383-ko00480 Glutathione metabolism;ko04918 Thyroid hormone synthesis	-	COG1249, Lpd, Pyruvate/2-oxoglutarate dehydrogenase complex, dihydrolipoamide dehydrogenase (E3) component, and related enzymes [Energy production and conversion]. 7.34e-50	-	WP_215873354.1 glutathione-disulfide reductase [Acidithiobacillus sp. YTS05] >MBU2755812.1 glutathione-disulfide reductase [Acidithiobacillus sp. CV18-3] >MBU2756273.1 glutathione-disulfide reductase [Acidithiobacillus sp. BN09-2] >MBU2777780.1 glutathione-disulfide reductase [Acidithiobacillus sp. CV18-2] >MBU2787501.1 glutathione-disulfide reductase [Acidithiobacillus sp. VAN18-1] >MBU2795964.1…	Acidithiobacillus sp. YTS05 chromosome, complete genome 0.0
gpx	TR1675	2.76987	0.5771470000000001	2.26281	0.00133623336009	0.00181030255853	up	cd00340, GSH_Peroxidase, Glutathione (GSH) peroxidase family; tetrameric selenoenzymes that catalyze the reduction of a variety of hydroperoxides including lipid peroxidases, using GSH as a specific electron donor substrate. GSH peroxidase contains one selenocysteine residue per subunit, which is involved in catalysis. Different isoenzymes are known in mammals,which are involved in protection aga…	pfam00255, GSHPx, Glutathione peroxidase. 3.22e-34	K00432-ko00480 Glutathione metabolism;ko04918 Thyroid hormone synthesis	-	COG0386, BtuE, Glutathione peroxidase [Posttranslational modification, protein turnover, chaperones]. 4.81e-63	-	WP_255789755.1 glutathione peroxidase [Acidithiobacillus sp. YTS05] >MBU2755157.1 glutathione peroxidase [Acidithiobacillus sp. CV18-3] >MBU2758127.1 glutathione peroxidase [Acidithiobacillus sp. BN09-2] >MBU2777695.1 glutathione peroxidase [Acidithiobacillus sp. CV18-2] >MBU2789350.1 glutathione peroxidase [Acidithiobacillus sp. VAN18-1] >MBU2797063.1 glutathione peroxidase [Acidithiobacillus sp…	Acidithiobacillus sp. YTS05 chromosome, complete genome 0.0
idh1	TR1032	23.0638	2.96251	2.96074	6.519375030169999e-46	2.0825781346399995e-45	up	-	pfam00180, Iso_dh, Isocitrate/isopropylmalate dehydrogenase. 3.26e-12	K00031-ko04146 Peroxisome;ko00020 Citrate cycle (TCA cycle);ko00480 Glutathione metabolism;ko00720 Carbon fixation pathways in prokaryotes	-	COG0538, Icd, Isocitrate dehydrogenases [Energy production and conversion]. 1.67e-77	-	WP_215871507.1 MULTISPECIES: NADP-dependent isocitrate dehydrogenase [unclassified Acidithiobacillus] >MBU2753928.1 NADP-dependent isocitrate dehydrogenase [Acidithiobacillus sp. CV18-3] >MBU2756156.1 NADP-dependent isocitrate dehydrogenase [Acidithiobacillus sp. BN09-2] >MBU2778601.1 NADP-dependent isocitrate dehydrogenase [Acidithiobacillus sp. CV18-2] >MBU2786854.1 NADP-dependent isocitrate de…	Acidithiobacillus sp. YTS05 chromosome, complete genome 0.0
g6pD	TR0139	30.0455	8.63861	1.79828	3.0770434118699987e-230	2.323323182189999e-229	up	cd16950, HATPase_EnvZ-like, Histidine kinase-like ATPase domain of two-component sensor histidine kinases similar to Escherichia coli EnvZ and Pseudomonas aeruginosa BfmS. This family includes the histidine kinase-like ATPase (HATPase) domains of various two-component sensor histidine kinase (HKs) such as Escherichia coli EnvZ of the EnvZ-OmpR two-component regulatory system (TCS), which function…	pfam02781, G6PD_C, Glucose-6-phosphate dehydrogenase, C-terminal domain. 3.21e-101	K00036-ko00480 Glutathione metabolism;ko00030 Pentose phosphate pathway	-	COG0364, Zwf, Glucose-6-phosphate 1-dehydrogenase [Carbohydrate transport and metabolism]. 1.71e-152	-	WP_215872672.1 MULTISPECIES: glucose-6-phosphate dehydrogenase [unclassified Acidithiobacillus] >MBU2755121.1 glucose-6-phosphate dehydrogenase [Acidithiobacillus sp. CV18-3] >MBU2756065.1 glucose-6-phosphate dehydrogenase [Acidithiobacillus sp. BN09-2] >MBU2778431.1 glucose-6-phosphate dehydrogenase [Acidithiobacillus sp. CV18-2] >MBU2788087.1 glucose-6-phosphate dehydrogenase [Acidithiobacillus…	Acidithiobacillus sp. YTS05 chromosome, complete genome 0.0
g6pD	TR0904	274.118	29.7959	3.20161	0	0	up	cd05302, FDH, NAD-dependent Formate Dehydrogenase (FDH). NAD-dependent formate dehydrogenase (FDH) catalyzes the NAD+-dependent oxidation of a formate anion to carbon dioxide coupled with the reduction of NAD+ to NADH. Formate/glycerate and related dehydrogenases of the D-specific 2-hydroxy acid dehydrogenase family have 2 highly similar subdomains of the alpha/beta form, with NAD binding occurri…	pfam02781, G6PD_C, Glucose-6-phosphate dehydrogenase, C-terminal domain. 1.07e-99	K00036-ko00480 Glutathione metabolism;ko00030 Pentose phosphate pathway	-	COG0364, Zwf, Glucose-6-phosphate 1-dehydrogenase [Carbohydrate transport and metabolism]. 1.64e-152	-	WP_215872672.1 MULTISPECIES: glucose-6-phosphate dehydrogenase [unclassified Acidithiobacillus] >MBU2755121.1 glucose-6-phosphate dehydrogenase [Acidithiobacillus sp. CV18-3] >MBU2756065.1 glucose-6-phosphate dehydrogenase [Acidithiobacillus sp. BN09-2] >MBU2778431.1 glucose-6-phosphate dehydrogenase [Acidithiobacillus sp. CV18-2] >MBU2788087.1 glucose-6-phosphate dehydrogenase [Acidithiobacillus…	Acidithiobacillus sp. YTS05 chromosome, complete genome 0.0
pepA	TR2296	90.7389	16.7467	2.43784	0	0	up	cd00433, Peptidase_M17, Cytosol aminopeptidase family, N-terminal and catalytic domains. Family M17 contains zinc- and manganese-dependent exopeptidases ( EC 3.4.11.1), including leucine aminopeptidase. They catalyze removal of amino acids from the N-terminus of a protein and play a key role in protein degradation and in the metabolism of biologically active peptides. They do not contain HEXXH mo…	pfam00883, Peptidase_M17, Cytosol aminopeptidase family, catalytic domain. The two associated zinc ions and the active site are entirely enclosed within the C-terminal catalytic domain in leucine aminopeptidase. 3.64e-97	K01255-ko00480 Glutathione metabolism	-	COG0260, PepB, Leucyl aminopeptidase [Amino acid transport and metabolism]. 4.54e-104	-	UTV82319.1 leucyl aminopeptidase [Acidithiobacillus sp. YTS05] 1.75e-269	Acidithiobacillus sp. YTS05 chromosome, complete genome 0.0
pepN	TR1879	2.19539	0.239472	3.19655	1.6652418109400001e-13	3.20816560225e-13	up	cd09600, M1_APN, Peptidase M1 family, including aminopeptidase N catalytic domain. This model represents the catalytic domain of aminopeptidase N (APN; CD13; alanyl aminopeptidase; EC 3.4.11.2), a type II integral membrane protease belonging to the M1 gluzincin family. It includes bacterial-type alanyl aminopeptidases as well as PfA-M1 aminopeptidase (Plasmodium falciparum-type). APN preferential…	-	K01256-ko00480 Glutathione metabolism	-	COG0308, PepN, Aminopeptidase N [Amino acid transport and metabolism]. 8.21e-24	-	WP_215871423.1 MULTISPECIES: aminopeptidase N [unclassified Acidithiobacillus] >MBU2753835.1 aminopeptidase N [Acidithiobacillus sp. CV18-3] >MBU2756597.1 aminopeptidase N [Acidithiobacillus sp. BN09-2] >MBU2777451.1 aminopeptidase N [Acidithiobacillus sp. CV18-2] >MBU2789107.1 aminopeptidase N [Acidithiobacillus sp. VAN18-1] >MBU2796187.1 aminopeptidase N [Acidithiobacillus sp. VAN18-2] 5.31e-177	Acidithiobacillus sp. YTS05 chromosome, complete genome 0.0
Flagellar assembly
fliC	TR0567	51.4473	9.09356	2.5001782603900002	0	0	up	-	pfam00669, Flagellin_N, Bacterial flagellin N-terminal helical region. Flagellins polymerize to form bacterial flagella. This family includes flagellins and hook associated protein 3. Structurally this family forms an extended helix that interacts with pfam00700. 4.34e-25	K02406-ko04621 NOD-like receptor signaling pathway;ko04626 Plant-pathogen interaction;ko02040 Flagellar assembly;ko02020 Two-component system	-	COG1344, FlgL, Flagellin and related hook-associated proteins [Cell motility and secretion]. 5.47e-09	-	WP_215871967.1 MULTISPECIES: flagellin [unclassified Acidithiobacillus] >MBU2754397.1 flagellar protein FlaB [Acidithiobacillus sp. CV18-3] >MBU2757580.1 flagellar protein FlaB [Acidithiobacillus sp. BN09-2] >MBU2777105.1 flagellar protein FlaB [Acidithiobacillus sp. CV18-2] >MBU2787399.1 flagellar protein FlaB [Acidithiobacillus sp. VAN18-1] >MBU2797418.1 flagellar protein FlaB [Acidithiobacillu…	Acidithiobacillus sp. YTS05 chromosome, complete genome 0.0
fliC	TR3209	31.7182	0.0001	18.2749	2.1583393505399997e-94	9.777931300189997e-94	up	-	pfam00669, Flagellin_N, Bacterial flagellin N-terminal helical region. Flagellins polymerize to form bacterial flagella. This family includes flagellins and hook associated protein 3. Structurally this family forms an extended helix that interacts with pfam00700. 1.05e-27	K02406-ko04621 NOD-like receptor signaling pathway;ko04626 Plant-pathogen interaction;ko02040 Flagellar assembly;ko02020 Two-component system	-	COG1344, FlgL, Flagellin and related hook-associated proteins [Cell motility and secretion]. 2.85e-30	-	WP_215871967.1 MULTISPECIES: flagellin [unclassified Acidithiobacillus] >MBU2754397.1 flagellar protein FlaB [Acidithiobacillus sp. CV18-3] >MBU2757580.1 flagellar protein FlaB [Acidithiobacillus sp. BN09-2] >MBU2777105.1 flagellar protein FlaB [Acidithiobacillus sp. CV18-2] >MBU2787399.1 flagellar protein FlaB [Acidithiobacillus sp. VAN18-1] >MBU2797418.1 flagellar protein FlaB [Acidithiobacillu…	Acidithiobacillus sp. YTS05 chromosome, complete genome 0.0
fliC	TR2071	13.7056	1.97521	2.7946875367199997	8.464289328299998e-64	3.1714567783999994e-63	up	-	pfam00669, Flagellin_N, Bacterial flagellin N-terminal helical region. Flagellins polymerize to form bacterial flagella. This family includes flagellins and hook associated protein 3. Structurally this family forms an extended helix that interacts with pfam00700. 4.09e-14	K02406-ko04621 NOD-like receptor signaling pathway;ko04626 Plant-pathogen interaction;ko02040 Flagellar assembly;ko02020 Two-component system	-	COG1344, FlgL, Flagellin and related hook-associated proteins [Cell motility and secretion]. 2.56e-17	-	WP_226827304.1 MULTISPECIES: flagellin [unclassified Acidithiobacillus] 4.07e-246	Acidithiobacillus sp. YTS05 chromosome, complete genome 0.0
flgF	TR1488	306.069	41.6827	2.8763362933999996	0	0	up	-	pfam06429, Flg_bbr_C, Flagellar basal body rod FlgEFG protein C-terminal. This family consists of a number of C-terminal domains of unknown function. This domain seems to be specific to flagellar basal-body rod and flagellar hook proteins in which pfam00460 is often present at the extreme N-terminus. 8.72e-12	K02391-ko02040 Flagellar assembly	-	COG4787, FlgF, Flagellar basal body rod protein [Cell motility and secretion]. 1.06e-49	-	WP_215871976.1 flagellar basal-body rod protein FlgF [Acidithiobacillus sp. YTS05] >MBU2754407.1 flagellar basal-body rod protein FlgF [Acidithiobacillus sp. CV18-3] >MBU2757570.1 flagellar basal-body rod protein FlgF [Acidithiobacillus sp. BN09-2] >MBU2777115.1 flagellar basal-body rod protein FlgF [Acidithiobacillus sp. CV18-2] >MBU2787409.1 flagellar basal-body rod protein FlgF [Acidithiobacil…	Acidithiobacillus sp. YTS05 chromosome, complete genome 0.0
flgB	TR1775	333.791	136.455	1.29052	1.78026712598e-26	4.36669295051e-26	up	-	-	K02387-ko02040 Flagellar assembly	-	-	-	WP_215871980.1 MULTISPECIES: flagellar basal body rod protein FlgB [unclassified Acidithiobacillus] >MBU2754411.1 flagellar basal body rod protein FlgB [Acidithiobacillus sp. CV18-3] >MBU2757566.1 flagellar basal body rod protein FlgB [Acidithiobacillus sp. BN09-2] >MBU2777119.1 flagellar basal body rod protein FlgB [Acidithiobacillus sp. CV18-2] >MBU2787413.1 flagellar basal body rod protein Flg…	Acidithiobacillus sp. YTS05 chromosome, complete genome 1.39e-153
flgE	TR0129	19.8493	6.227469999999999	1.6723664248399999	1.0481458015099996e-170	6.667991375539997e-170	up	-	pfam02107, FlgH, Flagellar L-ring protein. 1.19e-38	K02390-ko02040 Flagellar assembly	-	COG4786, FlgG, Flagellar basal body rod protein [Cell motility and secretion]. 2.35e-09	-	WP_215871977.1 MULTISPECIES: flagellar hook protein FlgE [unclassified Acidithiobacillus] >MBU2754408.1 flagellar hook protein FlgE [Acidithiobacillus sp. CV18-3] >MBU2757569.1 flagellar hook protein FlgE [Acidithiobacillus sp. BN09-2] >MBU2777116.1 flagellar hook protein FlgE [Acidithiobacillus sp. CV18-2] >MBU2787410.1 flagellar hook protein FlgE [Acidithiobacillus sp. VAN18-1] >MBU2797429.1 fl…	Acidithiobacillus sp. YTS05 chromosome, complete genome 0.0
flgK	TR1702	22.7372	11.0615	1.03951	0.000111728248412	0.00015999399556999999	up	-	-	K02396-ko02040 Flagellar assembly	-	COG1256, FlgK, Flagellar hook-associated protein [Cell motility and secretion]. 4.03e-11	-	WP_215871972.1 MULTISPECIES: hypothetical protein [unclassified Acidithiobacillus] >MBU2754402.1 hypothetical protein [Acidithiobacillus sp. CV18-3] >MBU2757575.1 hypothetical protein [Acidithiobacillus sp. BN09-2] >MBU2777110.1 hypothetical protein [Acidithiobacillus sp. CV18-2] >MBU2787404.1 hypothetical protein [Acidithiobacillus sp. VAN18-1] >MBU2797423.1 hypothetical protein [Acidithiobacill…	Acidithiobacillus sp. YTS05 chromosome, complete genome 0.0
fliR	TR1997	12.4786	5.714919999999999	1.1266508761299998	0.00156394819674	0.0021073479532400003	up	-	pfam01313, Bac_export_3, Bacterial export proteins, family 3. This family includes the following members; FliQ, MopD, HrcS, Hrp, YopS and SpaQ All of these members export proteins, that do not possess signal peptides, through the membrane. Although the proteins that these exporters move may be different, the exporters are thought to function in similar ways. 2.58e-07	K02421-ko02040 Flagellar assembly	-	COG1684, FliR, Flagellar biosynthesis pathway, component FliR [Cell motility and secretion / Intracellular trafficking and secretion]. 2.27e-15	-	WP_215871949.1 MULTISPECIES: flagellar biosynthetic protein FliR [unclassified Acidithiobacillus] >MBU2754377.1 flagellar biosynthetic protein FliR [Acidithiobacillus sp. CV18-3] >MBU2757600.1 flagellar biosynthetic protein FliR [Acidithiobacillus sp. BN09-2] >MBU2777085.1 flagellar biosynthetic protein FliR [Acidithiobacillus sp. CV18-2] >MBU2787379.1 flagellar biosynthetic protein FliR [Acidith…	Acidithiobacillus sp. YTS05 chromosome, complete genome 0.0
Quorum sensing
secA	TR2740	20.3832	8.951130000000001	1.18724	2.9893074121099995e-08	4.9877394878400004e-08	up	cd17928, DEXDc_SecA, DEXD-box helicase domain of SecA. SecA is a part of the Sec translocase that transports the vast majority of bacterial and ER-exported proteins. SecA binds both the signal sequence and the mature domain of the preprotein emerging from the ribosome. SecA belongs to the DEAD-like helicase superfamily, a diverse family of proteins involved in ATP-dependent RNA or DNA unwinding. …	pfam07517, SecA_DEAD, SecA DEAD-like domain. SecA protein binds to the plasma membrane where it interacts with proOmpA to support translocation of proOmpA through the membrane. SecA protein achieves this translocation, in association with SecY protein, in an ATP dependent manner. This domain represents the N-terminal ATP-dependent helicase domain, which is related to the pfam00270. 4.54e-122	K03070-ko02024 Quorum sensing;ko03070 Bacterial secretion system;ko03060 Protein export	-	COG0653, SecA, Preprotein translocase subunit SecA (ATPase, RNA helicase) [Intracellular trafficking and secretion]. 1.12e-112	-	WP_215873036.1 MULTISPECIES: preprotein translocase subunit SecA [unclassified Acidithiobacillus] >MBU2755491.1 preprotein translocase subunit SecA [Acidithiobacillus sp. CV18-3] >MBU2757838.1 preprotein translocase subunit SecA [Acidithiobacillus sp. BN09-2] >MBU2777897.1 preprotein translocase subunit SecA [Acidithiobacillus sp. CV18-2] >MBU2787727.1 preprotein translocase subunit SecA [Acidith…	Acidithiobacillus sp. YTS05 chromosome, complete genome 0.0
srp54	TR2488	201.425	31.2106	2.69014	0	0	up	cd18539, SRP_G, GTPase domain of signal recognition particle protein. The signal recognition particle (SRP) mediates the transport to or across the plasma membrane in bacteria and the endoplasmic reticulum in eukaryotes. SRP recognizes N-terminal signal sequences of newly synthesized polypeptides at the ribosome. The SRP-polypeptide complex is then targeted to the membrane by an interaction betwe…	pfam00448, SRP54, SRP54-type protein, GTPase domain. This family includes relatives of the G-domain of the SRP54 family of proteins. 1.41e-60	K03106-ko03060 Protein export;ko03070 Bacterial secretion system;ko02024 Quorum sensing	-	COG0541, Ffh, Signal recognition particle GTPase [Intracellular trafficking and secretion]. 4.54e-141	-	WP_215871262.1 MULTISPECIES: signal recognition particle protein [unclassified Acidithiobacillus] >MBU2753674.1 signal recognition particle protein [Acidithiobacillus sp. CV18-3] >MBU2756456.1 signal recognition particle protein [Acidithiobacillus sp. BN09-2] >MBU2776953.1 signal recognition particle protein [Acidithiobacillus sp. CV18-2] >MBU2788423.1 signal recognition particle protein [Acidith…	Acidithiobacillus sp. YTS05 chromosome, complete genome 0.0
ftsy	TR0769	21.7326	6.00455	1.8557360672499998	1.9092246626899995e-134	1.0670246245699997e-133	up	cd17874, FtsY, signal recognition particle receptor FtsY. FtsY, the bacterial signal-recognition particle (SRP) receptor (SR), is homologous to the SRP receptor alpha-subunit (SRalpha) of the eukaryotic SR. It interacts with the signal-recognition particle (SRP) and is required for the co-translational membrane targeting of proteins. 1.27e-79	pfam00448, SRP54, SRP54-type protein, GTPase domain. This family includes relatives of the G-domain of the SRP54 family of proteins. 1.03e-56	K03110-ko03070 Bacterial secretion system;ko03060 Protein export;ko02024 Quorum sensing	-	COG0552, FtsY, Signal recognition particle GTPase [Intracellular trafficking and secretion]. 3.00e-90	-	WP_226830574.1 MULTISPECIES: signal recognition particle-docking protein FtsY [unclassified Acidithiobacillus] >UTV81203.1 signal recognition particle-docking protein FtsY [Acidithiobacillus sp. YTS05] 3.70e-237	Acidithiobacillus sp. YTS05 chromosome, complete genome 0.0
yidC	TR0009	13.6988	2.6794599999999997	2.3540300702000003	1.6328660147299993e-182	1.0613629095799997e-181	up	cd20070, 5TM_YidC_Alb3, Five transmembrane core domain of membrane protein insertase YidC, Alb3, and similar proteins. This group is composed of the bacterial and chloroplastic members of the YidC/Oxa1/Alb3 protein family of insertases, including bacterial YidC, and chloroplastic ALBINO3 (Alb3) and Alb3-like proteins such as ALBINO3-like protein 1 (also called Alb4). Membrane protein insertase Yi…	pfam02096, 60KD_IMP, 60Kd inner membrane protein. 6.87e-46	K03217-ko02024 Quorum sensing;ko03060 Protein export;ko03070 Bacterial secretion system	-	COG0486, ThdF, Predicted GTPase [General function prediction only]. 5.62e-80	-	WP_215872183.1 tRNA uridine-5-carboxymethylaminomethyl(34) synthesis GTPase MnmE [Acidithiobacillus sp. YTS05] >MBU2754613.1 tRNA uridine-5-carboxymethylaminomethyl(34) synthesis GTPase MnmE [Acidithiobacillus sp. CV18-3] >MBU2757225.1 tRNA uridine-5-carboxymethylaminomethyl(34) synthesis GTPase MnmE [Acidithiobacillus sp. BN09-2] >MBU2776794.1 tRNA uridine-5-carboxymethylaminomethyl(34) synthesi…	Acidithiobacillus sp. YTS05 chromosome, complete genome 0.0
gadA/B	TR1903	206.555	0.651983	8.30748	0	0	up	cd06450, DOPA_deC_like, DOPA decarboxylase family. This family belongs to pyridoxal phosphate (PLP)-dependent aspartate aminotransferase superfamily (fold I). The major groups in this CD correspond to DOPA/tyrosine decarboxylase (DDC), histidine decarboxylase (HDC), and glutamate decarboxylase (GDC). DDC is active as a dimer and catalyzes the decarboxylation of tyrosine. GDC catalyzes the decarbo…	pfam00282, Pyridoxal_deC, Pyridoxal-dependent decarboxylase conserved domain. 1.07e-13	K01580-ko00410 beta-Alanine metabolism;ko00250 Alanine, aspartate and glutamate metabolism;ko02024 Quorum sensing;ko00430 Taurine and hypotaurine metabolism;ko00650 Butanoate metabolism;ko04727 GABAergic synapse	-	COG0076, GadB, Glutamate decarboxylase and related PLP-dependent proteins [Amino acid transport and metabolism]. 2.81e-51	-	WP_215871442.1 MULTISPECIES: glutamate decarboxylase [unclassified Acidithiobacillus] >MBU2753853.1 glutamate decarboxylase [Acidithiobacillus sp. CV18-3] >MBU2757449.1 glutamate decarboxylase [Acidithiobacillus sp. BN09-2] >MBU2777279.1 glutamate decarboxylase [Acidithiobacillus sp. CV18-2] >MBU2789158.1 glutamate decarboxylase [Acidithiobacillus sp. VAN18-1] >MBU2796238.1 glutamate decarboxylas…	Acidithiobacillus sp. YTS05 chromosome, complete genome 0.0

## Sheet: High-concentration exposure 
	Gene id	MeanTPM (A)	MeanTPM (C)	log2FoldChange	pValue	qValue	result	CDD	PFAM	KEGG	eggnog	COG	GO	NR	NT
Two-component system
ompF	TR3853	1.51732	0.0001	13.8892	2.04106359327e-92	5.785330386379999e-92	up	-	pfam00267, Porin_1, Gram-negative porin. 4.02e-59	K09476-ko02020 Two-component system	-	COG3203, OmpC, Outer membrane protein (porin) [Cell envelope biogenesis, outer membrane]. 4.57e-48	GO:0003674, molecular_function;GO:0005215, transporter activity;GO:0005216, ion channel activity;GO:0005488, binding;GO:0005515, protein binding;GO:0005575, cellular_component;GO:0005623, cell;GO:0006810, transport;GO:0006811, ion transport;GO:0006855, drug transmembrane transport;GO:0008104, protein localization;GO:0008150, biological_process;GO:0008320, protein transmembrane transporter activit…	WP_215216170.1 porin [Pectobacterium atrosepticum] >QWC53337.1 porin [Pectobacterium atrosepticum] 7.45e-161	Pectobacterium atrosepticum strain 36A chromosome, complete genome 0.0
ompR	TR2669	36.6644	16.8628	1.12054	2.7392744669200003e-18	3.66512932588e-18	up	cd17623, REC_OmpR_CpxR, phosphoacceptor receiver (REC) domain of CpxR-like OmpR family response regulators. CpxR is part of the CpxA/CpxR two-component regulatory system that mediates envelope stress responses that is key for virulence and antibiotic resistance in several Gram negative pathogens. CpxR is a transcription factor/response regulator that controls the expression of numerous genes, inc…	pfam00072, Response_reg, Response regulator receiver domain. This domain receives the signal from the sensor partner in bacterial two-component systems. It is usually found N-terminal to a DNA binding effector domain. 7.68e-22	K07659-ko02026 Biofilm formation - Escherichia coli;ko02020 Two-component system	-	COG0745, OmpR, Response regulators consisting of a CheY-like receiver domain and a winged-helix DNA-binding domain [Signal transduction mechanisms / Transcription]. 1.22e-31	-	WP_215870910.1 MULTISPECIES: response regulator transcription factor [unclassified Acidithiobacillus] >MBU2753315.1 response regulator transcription factor [Acidithiobacillus sp. CV18-3] >MBU2756345.1 response regulator transcription factor [Acidithiobacillus sp. BN09-2] >MBU2776132.1 response regulator transcription factor [Acidithiobacillus sp. CV18-2] >MBU2788834.1 response regulator transcrip…	Acidithiobacillus sp. YTS05 chromosome, complete genome 0.0
Sulfur metabolism
soxA	TR1505	3.39589	6.9989300000000005	-1.04334	1.854087301909999e-182	8.483424308759997e-182	down	cd14797, DUF302, Uncharacterized domain family DUF302. These domains are mostly found in bacterial single-domain proteins and have been shown to form homodimers; they may also bind zinc. Also characterized as COG3439. 5.36e-09	-	K17222-ko00920 Sulfur metabolism	-	COG3439, COG3439, Uncharacterized conserved protein [Function unknown]. 3.76e-08	-	WP_215872260.1 MULTISPECIES: sulfur oxidation c-type cytochrome SoxA [unclassified Acidithiobacillus] >MBU2754697.1 sulfur oxidation c-type cytochrome SoxA [Acidithiobacillus sp. CV18-3] >MBU2756835.1 sulfur oxidation c-type cytochrome SoxA [Acidithiobacillus sp. BN09-2] >MBU2778489.1 sulfur oxidation c-type cytochrome SoxA [Acidithiobacillus sp. CV18-2] >MBU2788271.1 sulfur oxidation c-type cyto…	Acidithiobacillus sp. YTS05 chromosome, complete genome 0.0
soxB	TR1609	8.09876	24.6802	-1.60758	1.3128759366199997e-134	4.814884469459998e-134	down	-	-	K17224-ko00920 Sulfur metabolism	-	-	-	WP_215872262.1 MULTISPECIES: thiosulfohydrolase SoxB [unclassified Acidithiobacillus] >MBU2754699.1 thiosulfohydrolase SoxB [Acidithiobacillus sp. CV18-3] >MBU2756837.1 thiosulfohydrolase SoxB [Acidithiobacillus sp. BN09-2] >MBU2778487.1 thiosulfohydrolase SoxB [Acidithiobacillus sp. CV18-2] >MBU2788269.1 thiosulfohydrolase SoxB [Acidithiobacillus sp. VAN18-1] >MBU2795293.1 thiosulfohydrolase Sox…	Acidithiobacillus sp. YTS05 chromosome, complete genome 4.59e-160
soeA	TR1953	9.98571	0.0001	16.6076	1.8506809393999995e-120	6.220055460659999e-120	up	cd02763, MopB_2, The MopB_2 CD includes a group of related uncharacterized bacterial molybdopterin-binding oxidoreductase-like domains with a putative N-terminal iron-sulfur [4Fe-4S] cluster binding site and molybdopterin cofactor binding site. These members belong to the molybdopterin_binding (MopB) superfamily of proteins. 2.19e-38	-	K21307-ko00920 Sulfur metabolism	-	COG0243, BisC, Anaerobic dehydrogenases, typically selenocysteine-containing [Energy production and conversion]. 4.58e-31	-	WP_215872251.1 MULTISPECIES: molybdopterin oxidoreductase family protein [unclassified Acidithiobacillus] >MBU2754688.1 molybdopterin-dependent oxidoreductase [Acidithiobacillus sp. CV18-3] >MBU2756826.1 molybdopterin-dependent oxidoreductase [Acidithiobacillus sp. BN09-2] >MBU2778498.1 molybdopterin-dependent oxidoreductase [Acidithiobacillus sp. CV18-2] >MBU2788280.1 molybdopterin-dependent oxi…	Acidithiobacillus sp. YTS05 chromosome, complete genome 0.0
soeB	TR2878	9.94394	0.15141	6.03728	0	0	up	-	-	K16937-ko00920 Sulfur metabolism	-	-	-	WP_127461186.1 DoxX family protein [Paenibacillus elgii] >NEN80933.1 DoxX family membrane protein [Paenibacillus elgii] 2.18e-126	Cohnella sp. LGH chromosome, complete genome 7.55e-20
soeB	TR3022	4.72349	0.0001	15.5276	3.2293716964499983e-183	1.4818574246599993e-182	up	-	-	K16937-ko00920 Sulfur metabolism	-	-	-	WP_155618415.1 DoxX family protein [Paenibacillus campinasensis] >MUG67384.1 DoxX family membrane protein [Paenibacillus campinasensis] 1.10e-97	Paenibacillus lautus strain E7593-69 chromosome, complete genome 1.70e-90
doxD	TR3022	4.72349	0.0001	15.5276	3.2293716964499983e-183	1.4818574246599993e-182	up	-	-	K16937-ko00920 Sulfur metabolism	-	-	-	WP_155618415.1 DoxX family protein [Paenibacillus campinasensis] >MUG67384.1 DoxX family membrane protein [Paenibacillus campinasensis] 1.10e-97	Paenibacillus lautus strain E7593-69 chromosome, complete genome 1.70e-90
Oxidative phosphorylation
nuoF	TR2533	0.614662	0.0001	12.5856	1.5080539511399995e-102	4.542193964859999e-102	up	cd03081, TRX_Fd_NuoE_FDH_gamma, TRX-like [2Fe-2S] Ferredoxin (Fd) family, NADH:ubiquinone oxidoreductase (Nuo) subunit E subfamily, NAD-dependent formate dehydrogenase (FDH) gamma subunit; composed of proteins similar to the gamma subunit of NAD-linked FDH of Ralstonia eutropha, a soluble enzyme that catalyzes the irreversible oxidation of formate to carbon dioxide accompanied by the reduction of…	pfam00346, Complex1_49kDa, Respiratory-chain NADH dehydrogenase, 49 Kd subunit. 4.16e-52	K00335-ko00190 Oxidative phosphorylation	-	COG1894, NuoF, NADH:ubiquinone oxidoreductase, NADH-binding (51 kD) subunit [Energy production and conversion]. 2.77e-78	-	WP_226827833.1 MULTISPECIES: NADH-ubiquinone oxidoreductase-F iron-sulfur binding region domain-containing protein [unclassified Acidithiobacillus] >UTV80644.1 SLBB domain-containing protein [Acidithiobacillus sp. YTS05] 2.99e-215	Acidithiobacillus sp. YTS05 chromosome, complete genome 0.0
isp	TR4038	2.0392	0.0001	14.3157	1.83119481094e-43	3.4395990444200003e-43	up	cd03471, Rieske_cytochrome_b6f, Iron-sulfur protein (ISP) component of the b6f complex family, Rieske domain; The Rieske domain is a [2Fe-2S] cluster binding domain involved in electron transfer. The cytochrome b6f complex from Mastigocladus laminosus, a thermophilic cyanobacterium, contains four large subunits, including cytochrome f, cytochrome b6, the Rieske ISP, and subunit IV; as well as fou…	-	K03886-ko00190 Oxidative phosphorylation	-	COG0723, QcrA, Rieske Fe-S protein [Energy production and conversion]. 8.88e-07	-	MBU7315860.1 ubiquinol-cytochrome c reductase iron-sulfur subunit [Paenibacillus sp. SM 69] 7.52e-47	Paenibacillus mucilaginosus K02, complete genome 5.81e-93
isp	TR4037	3.1212299999999997	0.0001	14.929827051300002	1.1961306404000001e-29	1.90981859714e-29	up	-	-	K03886-ko00190 Oxidative phosphorylation	-	-	-	WP_253409613.1 ubiquinol-cytochrome c reductase iron-sulfur subunit [Paenibacillus tyrfis] >MCP1307081.1 ubiquinol-cytochrome c reductase iron-sulfur subunit [Paenibacillus tyrfis] 6.25e-37	Paenibacillus naphthalenovorans strain 32O-Y chromosome, complete genome 4.60e-52
cytb	TR4040	5.105	0.0001	15.6396	1.37445925509e-24	2.0372133771599998e-24	up	-	-	K03887-ko00190 Oxidative phosphorylation	-	-	-	WP_036680612.1 cytochrome b6 [Paenibacillus tyrfis] >KEQ26070.1 cytochrome b6 [Paenibacillus tyrfis] 2.96e-21	-
cytb	TR4039	4.32073	0.0001	15.398988573099999	4.7674503317e-16	6.15179759707e-16	up	-	-	K03887-ko00190 Oxidative phosphorylation	-	-	-	PQP87903.1 cytochrome b6, partial [Paenibacillus sp. AR247] 1.18e-19	Planococcus plakortidis strain DSM 23997 chromosome, complete genome 5.94e-24
cyt1	TR4041	4.87187	0.0001	15.5722	4.40992302424e-23	6.38991571117e-23	up	-	-	K03888-ko00190 Oxidative phosphorylation	-	-	-	KPV55643.1 menaquinol-cytochrome C reductase, partial [Paenibacillus sp. A3] 1.80e-25	-
cyt2	TR4042	4.77883	0.0001	15.5444	3.46332400833e-14	4.3539450233400006e-14	up	-	-	K03888-ko00190 Oxidative phosphorylation	-	-	-	KPV55643.1 menaquinol-cytochrome C reductase, partial [Paenibacillus sp. A3] 2.83e-15	-
coxD	TR3096	2.98779	0.0001	14.8668	1.0629098083999998e-81	2.7783104003399997e-81	up	-	-	K02277-ko00190 Oxidative phosphorylation	-	COG3125, CyoD, Heme/copper-type cytochrome/quinol oxidase, subunit 4 [Energy production and conversion]. 1.33e-06	GO:0005575, cellular_component;GO:0005623, cell;GO:0005886, plasma membrane;GO:0016020, membrane;GO:0044464, cell part;GO:0071944, cell periphery	WP_003221356.1 MULTISPECIES: cytochrome c oxidase subunit IVB [Bacillus] >KFI04654.1 cytochrome B6 [Bacillus sp. BSC154] >ADM37585.1 cytochrome c oxidase, subunit IVB [Bacillus subtilis subsp. spizizenii str. W23] >AJW86949.1 cytochrome B6 [Bacillus intestinalis] >EFG92586.1 cytochrome c oxidase, subunit IVB [Bacillus subtilis subsp. spizizenii ATCC 6633 = JCM 2499] >KFK79853.1 cytochrome c oxida…	Bacillus subtilis strain FDAARGOS_606 chromosome, complete genome 0.0
coxC	TR3095	2.12292	0.0001	14.3738	2.6916498351699993e-89	7.442077476089998e-89	up	cd02863, Ubiquinol_oxidase_III, Ubiquinol oxidase subunit III subfamily. Ubiquinol oxidase, the terminal oxidase in the respiratory chains of aerobic bacteria, is a multi-chain transmembrane protein located in the cell membrane. It catalyzes the reduction of O2 and simultaneously pumps protons across the membrane. Ubiquinol oxidases feature four subunits in contrast to the 13 subunit bovine cytoc…	pfam00510, COX3, Cytochrome c oxidase subunit III. 8.24e-12	K02276-ko00190 Oxidative phosphorylation	-	COG1845, CyoC, Heme/copper-type cytochrome/quinol oxidase, subunit 3 [Energy production and conversion]. 2.60e-33	GO:0005575, cellular_component;GO:0005623, cell;GO:0005886, plasma membrane;GO:0016020, membrane;GO:0044464, cell part;GO:0071944, cell periphery	WP_003232244.1 MULTISPECIES: cytochrome c oxidase subunit III [Bacillus] >NP_389374.1 cytochrome caa3 oxidase (subunit III) [Bacillus subtilis subsp. subtilis str. 168] >P24012.2 RecName: Full=Cytochrome c oxidase subunit 3; AltName: Full=Caa-3605 subunit 3; AltName: Full=Cytochrome aa3 subunit 3; AltName: Full=Cytochrome c oxidase polypeptide III; AltName: Full=Oxidase aa(3) subunit 3 [Bacillus …	Bacillus subtilis strain FDAARGOS_606 chromosome, complete genome 0.0
coxB	TR3412	5.826458333330001	0.0001	15.8303	3.168677575609999e-70	7.690309775289999e-70	up	-	-	K02275-ko00190 Oxidative phosphorylation	-	-	GO:0005575, cellular_component;GO:0005623, cell;GO:0005886, plasma membrane;GO:0006091, generation of precursor metabolites and energy;GO:0006119, oxidative phosphorylation;GO:0006139, nucleobase-containing compound metabolic process;GO:0006163, purine nucleotide metabolic process;GO:0006725, cellular aromatic compound metabolic process;GO:0006753, nucleoside phosphate metabolic process;GO:000679…	WP_268329567.1 c-type cytochrome, partial [Bacillus inaquosorum] 3.59e-48	Bacillus subtilis strain FDAARGOS_606 chromosome, complete genome 5.14e-117
coxB	TR3188	4.46545	0.0001	15.4465	5.646877276689999e-122	1.9194570061199995e-121	up	cd13913, ba3_CcO_II_C, C-terminal cupredoxin domain of Ba3-like heme-copper oxidase subunit II. The ba3 family of heme-copper oxidases are transmembrane protein complexes in the respiratory chains of prokaryotes and some archaea, which catalyze the reduction of O2 and simultaneously pump protons across the membrane. It has been proposed that archaea acquired heme-copper oxidases through gene tran…	-	K02275-ko00190 Oxidative phosphorylation	-	-	-	WP_216795203.1 cupredoxin domain-containing protein [Paenibacillus sp. SM 69] >MBU7318594.1 cupredoxin domain-containing protein [Paenibacillus sp. SM 69] >GLI08063.1 hypothetical protein YDYSG_40930 [Paenibacillus tyrfis] 1.24e-81	-
coxA	TR3089	7.01377	0.0001	16.0979	1.2505062402700002e-12	1.5318461392200003e-12	up	-	-	K02274-ko00190 Oxidative phosphorylation	-	-	GO:0003674, molecular_function;GO:0003824, catalytic activity;GO:0005575, cellular_component;GO:0005623, cell;GO:0005886, plasma membrane;GO:0005887, integral component of plasma membrane;GO:0006091, generation of precursor metabolites and energy;GO:0006810, transport;GO:0006811, ion transport;GO:0006812, cation transport;GO:0008150, biological_process;GO:0008152, metabolic process;GO:0009060, ae…	WP_250540005.1 hypothetical protein, partial [Bacillus subtilis] 2.30e-14	Bacillus subtilis strain FDAARGOS_606 chromosome, complete genome 4.24e-44
coxA	TR2835	4.31409	0.03787430000000001	6.83169	0	0	up	cd01660, ba3-like_Oxidase_I, ba3-like heme-copper oxidase subunit I. The ba3 family of heme-copper oxidases are transmembrane protein complexes in the respiratory chains of prokaryotes and some archaea which catalyze the reduction of O2 and simultaneously pump protons across the membrane. It has been proposed that Archaea acquired heme-copper oxidases through gene transfer from Gram-positive bact…	pfam00115, COX1, Cytochrome C and Quinol oxidase polypeptide I. 2.29e-22	K02274-ko00190 Oxidative phosphorylation	-	COG0843, CyoB, Heme/copper-type cytochrome/quinol oxidases, subunit 1 [Energy production and conversion]. 3.69e-19	-	WP_216788607.1 b(o/a)3-type cytochrome-c oxidase subunit 1 [Paenibacillus sp. SM 69] >MBU7314168.1 b(o/a)3-type cytochrome-c oxidase subunit 1 [Paenibacillus sp. SM 69] 0.0	Paenibacillus sp. H1-7 chromosome, complete genome 0.0
coxA	TR3094	3.86949	0.0001	15.2399	4.788997213699999e-168	2.028331032279999e-167	up	cd01662, Ubiquinol_Oxidase_I, Ubiquinol oxidase subunit I. Ubiquinol oxidase, the terminal oxidase in the respiratory chains of aerobic bacteria, is a multi-chain transmembrane protein located in the cell membrane. It catalyzes the reduction of O2 and simultaneously pumps protons across the membrane. The number of subunits in ubiquinol oxidase varies from two to five. Subunit I contains a heme-co…	-	K02274-ko00190 Oxidative phosphorylation	-	COG0843, CyoB, Heme/copper-type cytochrome/quinol oxidases, subunit 1 [Energy production and conversion]. 6.13e-18	GO:0003674, molecular_function;GO:0003824, catalytic activity;GO:0005575, cellular_component;GO:0005623, cell;GO:0005886, plasma membrane;GO:0005887, integral component of plasma membrane;GO:0006091, generation of precursor metabolites and energy;GO:0006810, transport;GO:0006811, ion transport;GO:0006812, cation transport;GO:0008150, biological_process;GO:0008152, metabolic process;GO:0009060, ae…	KFK80256.1 cytochrome c oxidase subunit I [Bacillus intestinalis] 4.93e-127	Bacillus subtilis strain FDAARGOS_606 chromosome, complete genome 0.0
coxA	TR3091	3.42847	0.0001	15.0653	1.5283648100999996e-89	4.23552633534e-89	up	cd01662, Ubiquinol_Oxidase_I, Ubiquinol oxidase subunit I. Ubiquinol oxidase, the terminal oxidase in the respiratory chains of aerobic bacteria, is a multi-chain transmembrane protein located in the cell membrane. It catalyzes the reduction of O2 and simultaneously pumps protons across the membrane. The number of subunits in ubiquinol oxidase varies from two to five. Subunit I contains a heme-co…	pfam00115, COX1, Cytochrome C and Quinol oxidase polypeptide I. 3.65e-17	K02274-ko00190 Oxidative phosphorylation	-	COG0843, CyoB, Heme/copper-type cytochrome/quinol oxidases, subunit 1 [Energy production and conversion]. 1.29e-27	GO:0003674, molecular_function;GO:0003824, catalytic activity;GO:0005575, cellular_component;GO:0005623, cell;GO:0005886, plasma membrane;GO:0005887, integral component of plasma membrane;GO:0006091, generation of precursor metabolites and energy;GO:0006810, transport;GO:0006811, ion transport;GO:0006812, cation transport;GO:0008150, biological_process;GO:0008152, metabolic process;GO:0009060, ae…	WP_029946629.1 cbb3-type cytochrome c oxidase subunit I, partial [Bacillus subtilis] 6.42e-79	Bacillus subtilis strain FDAARGOS_606 chromosome, complete genome 0.0
coxA	TR3093	3.67917	0.0001	15.1671	7.031955248289999e-59	1.5473534629099997e-58	up	cd01662, Ubiquinol_Oxidase_I, Ubiquinol oxidase subunit I. Ubiquinol oxidase, the terminal oxidase in the respiratory chains of aerobic bacteria, is a multi-chain transmembrane protein located in the cell membrane. It catalyzes the reduction of O2 and simultaneously pumps protons across the membrane. The number of subunits in ubiquinol oxidase varies from two to five. Subunit I contains a heme-co…	pfam00115, COX1, Cytochrome C and Quinol oxidase polypeptide I. 5.86e-27	K02274-ko00190 Oxidative phosphorylation	-	COG0843, CyoB, Heme/copper-type cytochrome/quinol oxidases, subunit 1 [Energy production and conversion]. 6.45e-32	GO:0003674, molecular_function;GO:0003824, catalytic activity;GO:0005575, cellular_component;GO:0005623, cell;GO:0005886, plasma membrane;GO:0005887, integral component of plasma membrane;GO:0006091, generation of precursor metabolites and energy;GO:0006810, transport;GO:0006811, ion transport;GO:0006812, cation transport;GO:0008150, biological_process;GO:0008152, metabolic process;GO:0009060, ae…	WP_029946629.1 cbb3-type cytochrome c oxidase subunit I, partial [Bacillus subtilis] 4.74e-54	Bacillus subtilis strain FDAARGOS_606 chromosome, complete genome 3.59e-139
coxA	TR3090	8.22483	0.0001	16.327698239500002	6.20951004022e-14	7.781805460199999e-14	up	-	-	K02274-ko00190 Oxidative phosphorylation	-	-	GO:0003674, molecular_function;GO:0003824, catalytic activity;GO:0005575, cellular_component;GO:0005623, cell;GO:0005886, plasma membrane;GO:0005887, integral component of plasma membrane;GO:0006091, generation of precursor metabolites and energy;GO:0006810, transport;GO:0006811, ion transport;GO:0006812, cation transport;GO:0008150, biological_process;GO:0008152, metabolic process;GO:0009060, ae…	WP_250636073.1 cbb3-type cytochrome c oxidase subunit I, partial [Bacillus subtilis] 6.90e-10	Bacillus subtilis strain FDAARGOS_606 chromosome, complete genome 5.80e-37
qoxD	TR3548	2.56659	0.0001	14.6476	2.2949643031599992e-59	5.06978959377e-59	up	-	-	K02829-ko00190 Oxidative phosphorylation	-	COG3125, CyoD, Heme/copper-type cytochrome/quinol oxidase, subunit 4 [Energy production and conversion]. 1.35e-10	GO:0003674, molecular_function;GO:0003824, catalytic activity;GO:0006091, generation of precursor metabolites and energy;GO:0006119, oxidative phosphorylation;GO:0006139, nucleobase-containing compound metabolic process;GO:0006163, purine nucleotide metabolic process;GO:0006725, cellular aromatic compound metabolic process;GO:0006753, nucleoside phosphate metabolic process;GO:0006793, phosphorus …	WP_268361829.1 cytochrome aa3 quinol oxidase subunit IV, partial [Bacillus sp. S20C3] 7.19e-71	Bacillus subtilis strain FDAARGOS_606 chromosome, complete genome 1.20e-174
qoxC	TR3546	4.53213	0.0001	15.4679	6.08657056095e-08	6.93579207255e-08	up	cd02863, Ubiquinol_oxidase_III, Ubiquinol oxidase subunit III subfamily. Ubiquinol oxidase, the terminal oxidase in the respiratory chains of aerobic bacteria, is a multi-chain transmembrane protein located in the cell membrane. It catalyzes the reduction of O2 and simultaneously pumps protons across the membrane. Ubiquinol oxidases feature four subunits in contrast to the 13 subunit bovine cytoc…	-	K02828-ko00190 Oxidative phosphorylation	-	-	GO:0003674, molecular_function;GO:0003824, catalytic activity;GO:0006091, generation of precursor metabolites and energy;GO:0006119, oxidative phosphorylation;GO:0006139, nucleobase-containing compound metabolic process;GO:0006163, purine nucleotide metabolic process;GO:0006725, cellular aromatic compound metabolic process;GO:0006753, nucleoside phosphate metabolic process;GO:0006793, phosphorus …	MBN4663890.1 cytochrome o ubiquinol oxidase subunit III [Escherichia coli] 3.56e-15	Bacillus subtilis strain FDAARGOS_606 chromosome, complete genome 5.33e-43
qoxB	TR3606	4.06449	0.0001	15.3108	1.0723032641299996e-60	2.3981511318399995e-60	up	-	-	K02827-ko00190 Oxidative phosphorylation	-	-	GO:0003674, molecular_function;GO:0003824, catalytic activity;GO:0005575, cellular_component;GO:0005623, cell;GO:0005886, plasma membrane;GO:0005887, integral component of plasma membrane;GO:0006091, generation of precursor metabolites and energy;GO:0006119, oxidative phosphorylation;GO:0006139, nucleobase-containing compound metabolic process;GO:0006163, purine nucleotide metabolic process;GO:00…	TOG28086.1 hypothetical protein CGJ05_24185, partial [Vibrio parahaemolyticus] 4.79e-28	Bacillus subtilis strain FDAARGOS_606 chromosome, complete genome 4.46e-133
qoxB	TR3605	9.79027	0.0001	16.5791	3.0798362414299996e-30	4.963831032659999e-30	up	-	-	K02827-ko00190 Oxidative phosphorylation	-	COG0843, CyoB, Heme/copper-type cytochrome/quinol oxidases, subunit 1 [Energy production and conversion]. 3.15e-06	GO:0003674, molecular_function;GO:0003824, catalytic activity;GO:0005575, cellular_component;GO:0005623, cell;GO:0005886, plasma membrane;GO:0005887, integral component of plasma membrane;GO:0006091, generation of precursor metabolites and energy;GO:0006119, oxidative phosphorylation;GO:0006139, nucleobase-containing compound metabolic process;GO:0006163, purine nucleotide metabolic process;GO:00…	WP_268324858.1 cbb3-type cytochrome c oxidase subunit I, partial [Bacillus inaquosorum] 5.26e-18	Bacillus subtilis strain FDAARGOS_606 chromosome, complete genome 1.87e-53
F-type ATPase alpha	TR3776	6.494533333330001	0.0001	15.9869	4.8058495547699996e-20	6.652435565909999e-20	up	cd18116, ATP-synt_F1_alpha_N, F1-ATP synthase alpha (A) subunit, N-terminal domain. The alpha (A) subunit of the F1 complex of FoF1-ATP synthase, N-terminal domain. The F-ATP synthase (also called FoF1-ATPase) is found in bacterial plasma membranes, in mitochondrial inner membranes, and in chloroplast thylakoid membranes. It has also been found in the archaea Methanosarcina barkeri. It uses a pro…	-	K02111-ko00190 Oxidative phosphorylation;ko00195 Photosynthesis	-	COG0056, AtpA, F0F1-type ATP synthase, alpha subunit [Energy production and conversion]. 2.37e-13	-	WP_133234009.1 F0F1 ATP synthase subunit alpha [Paenibacillus piri] >TDF93548.1 F0F1 ATP synthase subunit alpha [Paenibacillus piri] 2.41e-16	Paenibacillus sp. HWE-109 chromosome 1.51e-24
F-type ATPase beta	TR3083	3.71303	0.0001	15.1803	4.180237269759998e-229	2.281256051659999e-228	up	cd01133, F1-ATPase_beta_CD, F1 ATP synthase beta subunit, central domain. The F-ATPase is found in bacterial plasma membranes, mitochondrial inner membranes and in chloroplast thylakoid membranes. It has also been found in the archaea Methanosarcina barkeri. It uses a proton gradient to drive ATP synthesis and hydrolyzes ATP to build the proton gradient. The mitochondrial extrinsic membrane domai…	pfam00006, ATP-synt_ab, ATP synthase alpha/beta family, nucleotide-binding domain. This entry includes the ATP synthase alpha and beta subunits, the ATP synthase associated with flagella and the termination factor Rho. 6.02e-45	K02112-ko00190 Oxidative phosphorylation;ko00195 Photosynthesis	-	COG0055, AtpD, F0F1-type ATP synthase, beta subunit [Energy production and conversion]. 3.19e-166	-	WP_010328918.1 MULTISPECIES: F0F1 ATP synthase subunit beta [Bacillus] >MBG9770572.1 ATP F0F1 synthase subunit beta [Bacillus vallismortis] >MBL3647773.1 F0F1 ATP synthase subunit beta [Bacillus sp. RHFS10] >MCI3983614.1 F0F1 ATP synthase subunit beta [Bacillus vallismortis] >MCI4138759.1 F0F1 ATP synthase subunit beta [Bacillus vallismortis] >MCO4852760.1 F0F1 ATP synthase subunit beta [Bacillus…	Bacillus subtilis strain FDAARGOS_606 chromosome, complete genome 0.0
F-type ATPase beta	TR3182	7.55827	0.0001	16.2058	3.059329319899999e-54	6.430368961359998e-54	up	cd18115, ATP-synt_F1_beta_N, F1-ATP synthase beta (B) subunit, N-terminal domain. The beta (B) subunit of the F1 complex of FoF1-ATP synthase, N-terminal domain. The F-ATP synthase (also called FoF1-ATPase) is found in bacterial plasma membranes, mitochondrial inner membranes and in chloroplast thylakoid membranes. It has also been found in the archaea Methanosarcina barkeri. It uses a proton gra…	-	K02112-ko00190 Oxidative phosphorylation;ko00195 Photosynthesis	-	COG0055, AtpD, F0F1-type ATP synthase, beta subunit [Energy production and conversion]. 1.69e-09	-	AGA21648.1 ATP synthase subunit beta [Bacillus subtilis subsp. subtilis str. BSP1] 4.34e-28	Bacillus subtilis strain FDAARGOS_606 chromosome, complete genome 1.04e-82
F-type ATPase beta	TR4148	3.07416	0.0001	14.9079	6.736849564579999e-26	1.0232485565199998e-25	up	cd18115, ATP-synt_F1_beta_N, F1-ATP synthase beta (B) subunit, N-terminal domain. The beta (B) subunit of the F1 complex of FoF1-ATP synthase, N-terminal domain. The F-ATP synthase (also called FoF1-ATPase) is found in bacterial plasma membranes, mitochondrial inner membranes and in chloroplast thylakoid membranes. It has also been found in the archaea Methanosarcina barkeri. It uses a proton gra…	-	K02112-ko00190 Oxidative phosphorylation;ko00195 Photosynthesis	-	COG0055, AtpD, F0F1-type ATP synthase, beta subunit [Energy production and conversion]. 1.46e-23	-	WP_010500433.1 MULTISPECIES: F0F1 ATP synthase subunit beta [Paenibacillus] >MBU7317553.1 F0F1 ATP synthase subunit beta [Paenibacillus sp. SM 69] >MCP1310504.1 F0F1 ATP synthase subunit beta [Paenibacillus tyrfis] 1.37e-35	-
F-type ATPase beta	TR3084	11.442763333299999	0.0001	16.8041	1.06434791051e-24	1.58296118699e-24	up	cd18110, ATP-synt_F1_beta_C, F1-ATP synthase beta (B) subunit, C-terminal domain. The beta (B) subunit of the F1 complex of F0F1-ATP synthase, C-terminal domain. The F-ATP synthase (also called FoF1-ATPase) is found in bacterial plasma membranes, mitochondrial inner membranes and in chloroplast thylakoid membranes. It has also been found in the archaea Methanosarcina barkeri. It uses a proton gra…	-	K02112-ko00190 Oxidative phosphorylation;ko00195 Photosynthesis	-	COG0055, AtpD, F0F1-type ATP synthase, beta subunit [Energy production and conversion]. 2.47e-12	-	MXF68797.1 F0F1 ATP synthase subunit beta [Escherichia coli] 1.08e-14	Bacillus subtilis strain FDAARGOS_606 chromosome, complete genome 1.69e-48
F-type ATPase beta	TR4149	2.1940366666699997	0.0001	14.4213	2.2004463958699998e-23	3.19858358409e-23	up	cd01133, F1-ATPase_beta_CD, F1 ATP synthase beta subunit, central domain. The F-ATPase is found in bacterial plasma membranes, mitochondrial inner membranes and in chloroplast thylakoid membranes. It has also been found in the archaea Methanosarcina barkeri. It uses a proton gradient to drive ATP synthesis and hydrolyzes ATP to build the proton gradient. The mitochondrial extrinsic membrane domai…	-	K02112-ko00190 Oxidative phosphorylation;ko00195 Photosynthesis	-	COG0055, AtpD, F0F1-type ATP synthase, beta subunit [Energy production and conversion]. 4.46e-23	-	MCE2141514.1 F0F1 ATP synthase subunit beta [Streptococcus thermophilus] 2.02e-34	Paenibacillus mucilaginosus 3016, complete genome 1.36e-62
F-type ATPase beta	TR4150	3.46403	0.0001	15.0802	3.56594292989e-22	5.08388527329e-22	up	cd18110, ATP-synt_F1_beta_C, F1-ATP synthase beta (B) subunit, C-terminal domain. The beta (B) subunit of the F1 complex of F0F1-ATP synthase, C-terminal domain. The F-ATP synthase (also called FoF1-ATPase) is found in bacterial plasma membranes, mitochondrial inner membranes and in chloroplast thylakoid membranes. It has also been found in the archaea Methanosarcina barkeri. It uses a proton gra…	-	K02112-ko00190 Oxidative phosphorylation;ko00195 Photosynthesis	-	COG0055, AtpD, F0F1-type ATP synthase, beta subunit [Energy production and conversion]. 9.88e-20	-	WP_235119617.1 F0F1 ATP synthase subunit beta [Paenibacillus sp. YPD9-1] >UJF33277.1 F0F1 ATP synthase subunit beta [Paenibacillus sp. YPD9-1] 3.24e-28	Paenibacillus sp. YPD9-1 chromosome, complete genome 1.30e-46
F-type ATPase gamma	TR3779	2.7756	0.0001	14.7605	1.6366438743799995e-54	3.4491314763499994e-54	up	cd12151, F1-ATPase_gamma, mitochondrial ATP synthase gamma subunit. The F-ATPase is found in bacterial plasma membranes, mitochondrial inner membranes and in chloroplast thylakoid membranes. It has also been found in the archaea Methanosarcina barkeri. It uses a proton gradient to drive ATP synthesis and hydrolyzes ATP to build the proton gradient. The extrinisic membrane domain of F-ATPases is c…	pfam00231, ATP-synt, ATP synthase. 8.45e-27	K02115-ko00195 Photosynthesis;ko00190 Oxidative phosphorylation	-	COG0224, AtpG, F0F1-type ATP synthase, gamma subunit [Energy production and conversion]. 3.96e-21	-	RFM40831.1 F0F1 ATP synthase subunit gamma [Bacillus inaquosorum] 2.12e-61	Bacillus subtilis strain FDAARGOS_606 chromosome, complete genome 8.46e-156
F-type ATPase gamma	TR3181	3.34045	0.0001	15.027753260699999	1.1355699344e-42	2.1147228428199995e-42	up	cd12151, F1-ATPase_gamma, mitochondrial ATP synthase gamma subunit. The F-ATPase is found in bacterial plasma membranes, mitochondrial inner membranes and in chloroplast thylakoid membranes. It has also been found in the archaea Methanosarcina barkeri. It uses a proton gradient to drive ATP synthesis and hydrolyzes ATP to build the proton gradient. The extrinisic membrane domain of F-ATPases is c…	pfam00231, ATP-synt, ATP synthase. 3.35e-31	K02115-ko00195 Photosynthesis;ko00190 Oxidative phosphorylation	-	COG0224, AtpG, F0F1-type ATP synthase, gamma subunit [Energy production and conversion]. 5.75e-34	-	SPT94933.1 ATP synthase F0F1 subunit gamma [Bacillus subtilis] 2.08e-39	Bacillus subtilis subsp. subtilis str. 168 chromosome, complete genome 8.76e-120
Nitrogen metabolism
nirB	TR3251	1.94572	0.0001	14.248	6.931882297879999e-170	2.9674408477299985e-169	up	cd03530, Rieske_NirD_small_Bacillus, Small subunit of nitrite reductase (NirD) family, Rieske domain; composed of proteins similar to the Bacillus subtilis small subunit of assimilatory nitrite reductase containing a Rieske domain. The Rieske domain is a [2Fe-2S] cluster binding domain involved in electron transfer. Assimilatory nitrate and nitrite reductases convert nitrate through nitrite to am…	pfam01077, NIR_SIR, Nitrite and sulphite reductase 4Fe-4S domain. Sulphite and nitrite reductases are vital in the biosynthetic assimilation of sulphur and nitrogen, respectfully. They are also both important for the dissimilation of oxidized anions for energy transduction. 6.78e-15	K00362-ko00910 Nitrogen metabolism	-	COG1251, NirB, NAD(P)H-nitrite reductase [Energy production and conversion]. 6.25e-60	-	WP_025700324.1 nitrite reductase large subunit NirB [Paenibacillus durus] 2.60e-131	Paenibacillus sp. PHS-Z3 chromosome, complete genome 0.0
nirB	TR3341	2.24401	0.0001	14.4538	7.824173929749998e-121	2.6407966451199992e-120	up	-	pfam07992, Pyr_redox_2, Pyridine nucleotide-disulphide oxidoreductase. This family includes both class I and class II oxidoreductases and also NADH oxidases and peroxidases. This domain is actually a small NADH binding domain within a larger FAD binding domain. 3.18e-13	K00362-ko00910 Nitrogen metabolism	-	COG1251, NirB, NAD(P)H-nitrite reductase [Energy production and conversion]. 6.83e-61	-	WP_216795160.1 nitrite reductase large subunit NirB [Paenibacillus sp. SM 69] >MBU7318555.1 nitrite reductase large subunit NirB [Paenibacillus sp. SM 69] 3.03e-139	Paenibacillus sp. 481 chromosome, complete genome 4.26e-127
nirB	TR3343	1.45515	0.0001	13.8289	1.8514695225599993e-118	6.128031213679999e-118	up	cd19943, NirB_Fer2_BFD-like_1, first bacterioferritin-associated ferredoxin (BFD)-like [2Fe-2S]-binding domain of the large subunit of the NADH-dependent nitrite reductase. The NADH-dependent nitrite reductase (NirBD) complex comprises a large and a small subunit, and is also known as nitrite reductase (reduced nicotinamide adenine dinucleotide), NADH-nitrite oxidoreductase, and assimilatory nitr…	pfam04324, Fer2_BFD, BFD-like [2Fe-2S] binding domain. The two Fe ions are each coordinated by two conserved cysteine residues. This domain occurs alone in small proteins such as Bacterioferritin-associated ferredoxin (BFD). The function of BFD is not known, but it may may be a general redox and/or regulatory component involved in the iron storage or mobilisation functions of bacterioferritin in …	K00362-ko00910 Nitrogen metabolism	-	COG1251, NirB, NAD(P)H-nitrite reductase [Energy production and conversion]. 1.83e-97	-	WP_251603913.1 nitrite reductase large subunit NirB [Paenibacillus elgii] >MCM3272541.1 nitrite reductase large subunit NirB [Paenibacillus elgii] 8.60e-209	Paenibacillus mucilaginosus K02, complete genome 6.72e-52
nirB	TR3342	2.4596	0.0001	14.5861	2.6332024099800003e-44	5.0079502222e-44	up	-	pfam07992, Pyr_redox_2, Pyridine nucleotide-disulphide oxidoreductase. This family includes both class I and class II oxidoreductases and also NADH oxidases and peroxidases. This domain is actually a small NADH binding domain within a larger FAD binding domain. 3.75e-11	K00362-ko00910 Nitrogen metabolism	-	COG1251, NirB, NAD(P)H-nitrite reductase [Energy production and conversion]. 1.49e-37	-	WP_036689720.1 nitrite reductase large subunit NirB [Paenibacillus tyrfis] >KEQ23054.1 nitrite reductase [Paenibacillus tyrfis] 8.69e-56	Paenibacillus sp. PHS-Z3 chromosome, complete genome 1.15e-74
arcc	TR4012	12.0635	0.0001	16.8803	3.3850881898099994e-35	5.781952918079999e-35	up	-	-	K00926-ko00230 Purine metabolism;ko00220 Arginine biosynthesis;ko00910 Nitrogen metabolism	-	-	GO:0003674, molecular_function;GO:0003824, catalytic activity;GO:0005575, cellular_component;GO:0005622, intracellular;GO:0005623, cell;GO:0005737, cytoplasm;GO:0005829, cytosol;GO:0006082, organic acid metabolic process;GO:0006520, cellular amino acid metabolic process;GO:0006525, arginine metabolic process;GO:0006527, arginine catabolic process;GO:0006793, phosphorus metabolic process;GO:000679…	MBX8360489.1 carbamate kinase [Staphylococcus aureus] 7.29e-15	Staphylococcus aureus TPS3156 DNA, complete genome 2.37e-52
glna	TR0959	13.900753333299999	5.67396	1.29274	1.0319965666299999e-26	1.58610647652e-26	up	-	pfam00120, Gln-synt_C, Glutamine synthetase, catalytic domain. 3.70e-17	K01915-ko00910 Nitrogen metabolism;ko04724 Glutamatergic synapse;ko04727 GABAergic synapse;ko00220 Arginine biosynthesis;ko00630 Glyoxylate and dicarboxylate metabolism;ko02020 Two-component system;ko04217 Necroptosis;ko00250 Alanine, aspartate and glutamate metabolism	-	COG0174, GlnA, Glutamine synthetase [Amino acid transport and metabolism]. 2.44e-28	-	WP_215873440.1 MULTISPECIES: type I glutamate--ammonia ligase, partial [unclassified Acidithiobacillus] >MBU2757469.1 type I glutamate--ammonia ligase [Acidithiobacillus sp. BN09-2] >MBU2795430.1 type I glutamate--ammonia ligase [Acidithiobacillus sp. VAN18-2] >MBU2799540.1 type I glutamate--ammonia ligase [Acidithiobacillus sp. VAN18-4] 1.84e-123	Acidithiobacillus sp. YTS05 chromosome, complete genome 0.0
gltI	TR3035	4.8668	0.0001	15.5707	1.0233e-124	3.55149e-124	up	cd13688, PBP2_GltI_DEBP, Substrate-binding domain of ABC aspartate-glutamate transporter; the type 2 periplasmic binding protein fold. This subfamily represents the periplasmic-binding protein component of ABC transporter specific for carboxylic amino acids, including GtlI from Escherichia coli. The aspartate-glutamate binding domain belongs to the type 2 periplasmic binding protein fold superfam…	-	K10001-ko02010 ABC transporters;ko02020 Two-component system	-	-	-	MCL6408729.1 transporter substrate-binding domain-containing protein [Dickeya dadantii] 1.66e-44	Pectobacterium atrosepticum strain 36A chromosome, complete genome 0.0
gstA/B	TR0490	63.1738	5.68477	3.47415	0	0	up	cd13540, PBP2_ModA_WtpA, Substrate binding domain of ModA/WtpA from Pyrococcus furiosus and its closest homologs;the type 2 periplasmic binding protein fold. This subfamily contains domains found in ModA proteins that serve as initial receptors in the ABC transport of molybdate in eubacteria and archaea. Bacteria and archaea import molybdenum and tungsten from the environment in the form of the o…	-	K15495-ko02010 ABC transporters	-	-	-	WP_215872678.1 MULTISPECIES: extracellular solute-binding protein [unclassified Acidithiobacillus] >MBU2755128.1 extracellular solute-binding protein [Acidithiobacillus sp. CV18-3] >MBU2756072.1 extracellular solute-binding protein [Acidithiobacillus sp. BN09-2] >MBU2778438.1 extracellular solute-binding protein [Acidithiobacillus sp. CV18-2] >MBU2788080.1 extracellular solute-binding protein [Ac…	Acidithiobacillus sp. YTS05 chromosome, complete genome 0.0
Glutathione metabolism
idh1	TR3540	2.03621	0.0001	14.3136	7.168297708349999e-22	1.0166683310799999e-21	up	-	-	K00031-ko04146 Peroxisome;ko00020 Citrate cycle (TCA cycle);ko00480 Glutathione metabolism;ko00720 Carbon fixation pathways in prokaryotes	-	COG0538, Icd, Isocitrate dehydrogenases [Energy production and conversion]. 5.97e-10	-	WP_003223557.1 MULTISPECIES: NADP-dependent isocitrate dehydrogenase [Bacillus] >KFI03815.1 isocitrate dehydrogenase [Bacillus sp. BSC154] >CUB16060.1 Isocitrate dehydrogenase [NADP] [Bacillus cereus] >ADM38869.1 isocitrate dehydrogenase [Bacillus subtilis subsp. spizizenii str. W23] >AEP87767.1 isocitrate dehydrogenase, NADP-dependent [Bacillus subtilis subsp. spizizenii TU-B-10] >AJW84402.1 iso…	Bacillus subtilis strain FDAARGOS_606 chromosome, complete genome 2.78e-104
speE	TR0433	33.1333	14.8742	1.1554699687899999	1.9507783258199998e-62	4.4227499134899995e-62	up	-	pfam04305, DUF455, Protein of unknown function (DUF455). 6.72e-75	K00797-ko00480 Glutathione metabolism;ko00330 Arginine and proline metabolism;ko00270 Cysteine and methionine metabolism	-	COG0533, QRI7, Metal-dependent proteases with possible chaperone activity [Posttranslational modification, protein turnover, chaperones]. 1.05e-82	-	WP_226827764.1 MULTISPECIES: tRNA (adenosine(37)-N6)-threonylcarbamoyltransferase complex transferase subunit TsaD [unclassified Acidithiobacillus] 1.47e-211	Acidithiobacillus sp. YTS05 chromosome, complete genome 0.0
Flagellar assembly
TR3413	5.8722333333300005	0.0001	15.8416	1.6393628922199998e-51	3.3644900523899995e-51	up	-	pfam00669, Flagellin_N, Bacterial flagellin N-terminal helical region. Flagellins polymerize to form bacterial flagella. This family includes flagellins and hook associated protein 3. Structurally this family forms an extended helix that interacts with pfam00700. 3.24e-17	K02406-ko04621 NOD-like receptor signaling pathway;ko04626 Plant-pathogen interaction;ko02040 Flagellar assembly;ko02020 Two-component system	-	COG1344, FlgL, Flagellin and related hook-associated proteins [Cell motility and secretion]. 6.08e-21	GO:0005575, cellular_component;GO:0005576, extracellular region;GO:0005623, cell;GO:0009288, bacterial-type flagellum;GO:0042995, cell projection;GO:0043226, organelle;GO:0043228, non-membrane-bounded organelle;GO:0044464, cell part	WP_148343465.1 flagellin, partial [Bacillus subtilis] 1.38e-31	Bacillus subtilis strain FDAARGOS_606 chromosome, complete genome 3.23e-93
TR3777	3.07491	0.0001	14.9083	4.3657717605999995e-26	6.65114870166e-26	up	-	-	K02392-ko02040 Flagellar assembly	-	COG4786, FlgG, Flagellar basal body rod protein [Cell motility and secretion]. 6.45e-19	GO:0001539, cilium or flagellum-dependent cell motility;GO:0005575, cellular_component;GO:0005623, cell;GO:0006928, movement of cell or subcellular component;GO:0008150, biological_process;GO:0009279, cell outer membrane;GO:0009288, bacterial-type flagellum;GO:0009424, bacterial-type flagellum hook;GO:0009425, bacterial-type flagellum basal body;GO:0009987, cellular process;GO:0016020, membrane;G…	WP_010301659.1 MULTISPECIES: flagellar basal-body rod protein FlgG [Pectobacterium] >ACT13624.1 flagellar basal-body rod protein FlgG [Pectobacterium carotovorum subsp. carotovorum PC1] >ASN86232.1 Flagellar basal-body rod protein FlgG [Pectobacterium versatile] >ASY79994.1 flagellar basal-body rod protein FlgG [Pectobacterium polaris] >AVT58235.1 flagellar basal body rod protein FlgG [Pectobacte…	Pectobacterium atrosepticum strain 36A chromosome, complete genome 6.73e-90
TR2626	3.4943470000000003	12.7685	-1.86949	5.210919227289999e-68	1.2407691254599999e-67	down	-	-	K02397-ko02040 Flagellar assembly	-	-	-	WP_215871970.1 MULTISPECIES: flagellar hook-associated protein FlgL [unclassified Acidithiobacillus] >MBU2754400.1 flagellar hook-associated protein FlgL [Acidithiobacillus sp. CV18-3] >MBU2757577.1 flagellar hook-associated protein FlgL [Acidithiobacillus sp. BN09-2] >MBU2777108.1 flagellar hook-associated protein FlgL [Acidithiobacillus sp. CV18-2] >MBU2787402.1 flagellar hook-associated protei…	Acidithiobacillus sp. YTS05 chromosome, complete genome 0.0
TR3777	3.07491	0.0001	14.9083	4.3657717605999995e-26	6.65114870166e-26	up	-	-	K02392-ko02040 Flagellar assembly	-	COG4786, FlgG, Flagellar basal body rod protein [Cell motility and secretion]. 6.45e-19	GO:0001539, cilium or flagellum-dependent cell motility;GO:0005575, cellular_component;GO:0005623, cell;GO:0006928, movement of cell or subcellular component;GO:0008150, biological_process;GO:0009279, cell outer membrane;GO:0009288, bacterial-type flagellum;GO:0009424, bacterial-type flagellum hook;GO:0009425, bacterial-type flagellum basal body;GO:0009987, cellular process;GO:0016020, membrane;G…	WP_010301659.1 MULTISPECIES: flagellar basal-body rod protein FlgG [Pectobacterium] >ACT13624.1 flagellar basal-body rod protein FlgG [Pectobacterium carotovorum subsp. carotovorum PC1] >ASN86232.1 Flagellar basal-body rod protein FlgG [Pectobacterium versatile] >ASY79994.1 flagellar basal-body rod protein FlgG [Pectobacterium polaris] >AVT58235.1 flagellar basal body rod protein FlgG [Pectobacte…	Pectobacterium atrosepticum strain 36A chromosome, complete genome 6.73e-90
TR5278	16.406746666700002	37.2176	-1.1817	3.158289629589999e-65	7.366264214049998e-65	down	-	-	K07711-ko02024 Quorum sensing;ko02020 Two-component system	-	-	-	WP_215872101.1 MULTISPECIES: HAMP domain-containing sensor histidine kinase [unclassified Acidithiobacillus] >MBU2754529.1 HAMP domain-containing histidine kinase [Acidithiobacillus sp. CV18-3] >MBU2758194.1 HAMP domain-containing histidine kinase [Acidithiobacillus sp. BN09-2] >MBU2776365.1 HAMP domain-containing histidine kinase [Acidithiobacillus sp. CV18-2] >MBU2787538.1 HAMP domain-containin…	Acidithiobacillus sp. YTS05 chromosome, complete genome 8.76e-120
TR1851	13.5663	33.6093	-1.30883	0	0	down	-	pfam00158, Sigma54_activat, Sigma-54 interaction domain. 5.87e-21	K07715-ko02024 Quorum sensing;ko02020 Two-component system	-	COG2204, AtoC, Response regulator containing CheY-like receiver, AAA-type ATPase, and DNA-binding domains [Signal transduction mechanisms]. 1.05e-54	-	WP_215872102.1 MULTISPECIES: sigma 54-interacting transcriptional regulator [unclassified Acidithiobacillus] >MBU2754531.1 sigma 54-interacting transcriptional regulator [Acidithiobacillus sp. CV18-3] >MBU2758192.1 sigma 54-interacting transcriptional regulator [Acidithiobacillus sp. BN09-2] >MBU2776367.1 sigma 54-interacting transcriptional regulator [Acidithiobacillus sp. CV18-2] >MBU2787536.1 …	Acidithiobacillus sp. YTS05 chromosome, complete genome 0.0
TR4053	1.3310966666700002	0.0001	13.7003	8.95059341232e-36	1.53981092996e-35	up	-	pfam08769, Spo0A_C, Sporulation initiation factor Spo0A C terminal. The response regulator Spo0A is comprised of a phophoacceptor domain and a transcription activation domain. This domain corresponds to the transcription activation domain and forms an alpha helical structure comprising of 6 alpha helices. The structure contains a helix-turn-helix and binds DNA. 1.14e-38	K07699-ko02020 Two-component system;ko02024 Quorum sensing	-	-	GO:0000003, reproduction;GO:0000156, phosphorelay response regulator activity;GO:0000160, phosphorelay signal transduction system;GO:0000910, cytokinesis;GO:0003674, molecular_function;GO:0006355, regulation of transcription, DNA-templated;GO:0007049, cell cycle;GO:0007154, cell communication;GO:0007165, signal transduction;GO:0008150, biological_process;GO:0008356, asymmetric cell division;GO:00…	WP_010499100.1 MULTISPECIES: sporulation transcription factor Spo0A [Paenibacillus] >MBU7317281.1 sporulation transcription factor Spo0A [Paenibacillus sp. SM 69] >PUA38650.1 sporulation transcription factor Spo0A [Paenibacillus elgii] >GLI07358.1 stage 0 sporulation protein A [Paenibacillus tyrfis] 2.98e-77	Paenibacillus konkukensis strain SK3146 chromosome 1.14e-85
TR3975	2.19223	0.0001	14.420114399300001	1.6123046999699998e-65	3.7751909462199996e-65	up	cd17553, REC_Spo0F-like, phosphoacceptor receiver (REC) domain of Spo0F and similar domains. Spo0F, a stand-alone response regulator containing only a REC domain with no output/effector domain, controls sporulation in Bacillus subtilis through the exchange of a phosphoryl group. Bacillus subtilis forms spores when conditions for growth become unfavorable. The initiation of sporulation is controll…	pfam00072, Response_reg, Response regulator receiver domain. This domain receives the signal from the sensor partner in bacterial two-component systems. It is usually found N-terminal to a DNA binding effector domain. 1.13e-28	K02490-ko02020 Two-component system;ko02024 Quorum sensing	-	COG2204, AtoC, Response regulator containing CheY-like receiver, AAA-type ATPase, and DNA-binding domains [Signal transduction mechanisms]. 3.10e-22	-	WP_010500317.1 MULTISPECIES: response regulator [Paenibacillus] >KEQ23657.1 hypothetical protein ET33_16210 [Paenibacillus tyrfis] >KPV55957.1 CheY-like receiver protein [Paenibacillus sp. A3] >KZE72095.1 two-component system response regulator [Paenibacillus elgii] >MBU7319063.1 response regulator [Paenibacillus sp. SM 69] >MCM3270444.1 response regulator [Paenibacillus elgii] 1.45e-81	Paenibacillus sp. B01 chromosome, complete genome 2.20e-63
Quorum sensing
Qse	TR5278	16.406746666700002	37.2176	-1.1817	3.158289629589999e-65	7.366264214049998e-65	down	-	-	K07711-ko02024 Quorum sensing;ko02020 Two-component system	-	-	-	WP_215872101.1 MULTISPECIES: HAMP domain-containing sensor histidine kinase [unclassified Acidithiobacillus] >MBU2754529.1 HAMP domain-containing histidine kinase [Acidithiobacillus sp. CV18-3] >MBU2758194.1 HAMP domain-containing histidine kinase [Acidithiobacillus sp. BN09-2] >MBU2776365.1 HAMP domain-containing histidine kinase [Acidithiobacillus sp. CV18-2] >MBU2787538.1 HAMP domain-containin…	Acidithiobacillus sp. YTS05 chromosome, complete genome 8.76e-120
qsef	TR1851	13.5663	33.6093	-1.30883	0	0	down	-	pfam00158, Sigma54_activat, Sigma-54 interaction domain. 5.87e-21	K07715-ko02024 Quorum sensing;ko02020 Two-component system	-	COG2204, AtoC, Response regulator containing CheY-like receiver, AAA-type ATPase, and DNA-binding domains [Signal transduction mechanisms]. 1.05e-54	-	WP_215872102.1 MULTISPECIES: sigma 54-interacting transcriptional regulator [unclassified Acidithiobacillus] >MBU2754531.1 sigma 54-interacting transcriptional regulator [Acidithiobacillus sp. CV18-3] >MBU2758192.1 sigma 54-interacting transcriptional regulator [Acidithiobacillus sp. BN09-2] >MBU2776367.1 sigma 54-interacting transcriptional regulator [Acidithiobacillus sp. CV18-2] >MBU2787536.1 …	Acidithiobacillus sp. YTS05 chromosome, complete genome 0.0
spo0A	TR4053	1.3310966666700002	0.0001	13.7003	8.95059341232e-36	1.53981092996e-35	up	-	pfam08769, Spo0A_C, Sporulation initiation factor Spo0A C terminal. The response regulator Spo0A is comprised of a phophoacceptor domain and a transcription activation domain. This domain corresponds to the transcription activation domain and forms an alpha helical structure comprising of 6 alpha helices. The structure contains a helix-turn-helix and binds DNA. 1.14e-38	K07699-ko02020 Two-component system;ko02024 Quorum sensing	-	-	GO:0000003, reproduction;GO:0000156, phosphorelay response regulator activity;GO:0000160, phosphorelay signal transduction system;GO:0000910, cytokinesis;GO:0003674, molecular_function;GO:0006355, regulation of transcription, DNA-templated;GO:0007049, cell cycle;GO:0007154, cell communication;GO:0007165, signal transduction;GO:0008150, biological_process;GO:0008356, asymmetric cell division;GO:00…	WP_010499100.1 MULTISPECIES: sporulation transcription factor Spo0A [Paenibacillus] >MBU7317281.1 sporulation transcription factor Spo0A [Paenibacillus sp. SM 69] >PUA38650.1 sporulation transcription factor Spo0A [Paenibacillus elgii] >GLI07358.1 stage 0 sporulation protein A [Paenibacillus tyrfis] 2.98e-77	Paenibacillus konkukensis strain SK3146 chromosome 1.14e-85
spo0F	TR3975	2.19223	0.0001	14.420114399300001	1.6123046999699998e-65	3.7751909462199996e-65	up	cd17553, REC_Spo0F-like, phosphoacceptor receiver (REC) domain of Spo0F and similar domains. Spo0F, a stand-alone response regulator containing only a REC domain with no output/effector domain, controls sporulation in Bacillus subtilis through the exchange of a phosphoryl group. Bacillus subtilis forms spores when conditions for growth become unfavorable. The initiation of sporulation is controll…	pfam00072, Response_reg, Response regulator receiver domain. This domain receives the signal from the sensor partner in bacterial two-component systems. It is usually found N-terminal to a DNA binding effector domain. 1.13e-28	K02490-ko02020 Two-component system;ko02024 Quorum sensing	-	COG2204, AtoC, Response regulator containing CheY-like receiver, AAA-type ATPase, and DNA-binding domains [Signal transduction mechanisms]. 3.10e-22	-	WP_010500317.1 MULTISPECIES: response regulator [Paenibacillus] >KEQ23657.1 hypothetical protein ET33_16210 [Paenibacillus tyrfis] >KPV55957.1 CheY-like receiver protein [Paenibacillus sp. A3] >KZE72095.1 two-component system response regulator [Paenibacillus elgii] >MBU7319063.1 response regulator [Paenibacillus sp. SM 69] >MCM3270444.1 response regulator [Paenibacillus elgii] 1.45e-81	Paenibacillus sp. B01 chromosome, complete genome 2.20e-63
ABC.PE.S	TR3957	2.38711	0.0001	14.542975413499999	8.95059341232e-36	1.53981092996e-35	up	cd08498, PBP2_NikA_DppA_OppA_like_2, The substrate-binding component of an uncharacterized ABC-type nickel/dipeptide/oligopeptide-like import system contains the type 2 periplasmic binding fold. This CD represents the substrate-binding domain of an uncharacterized ATP-binding cassette (ABC) type nickel/dipeptide/oligopeptide-like transporter. The oligopeptide-binding protein OppA and the dipeptid…	pfam00496, SBP_bac_5, Bacterial extracellular solute-binding proteins, family 5 Middle. The borders of this family are based on the PDBSum definitions of the domain edges for Salmonella typhimurium oppA. 1.13e-06	K02035-ko02024 Quorum sensing	-	-	-	UYA58307.1 ABC transporter, substrate-binding protein (cluster 5, nickel/peptides/opines) [Pectobacterium sp. F1-1] 7.26e-48	Pectobacterium atrosepticum strain 36A chromosome, complete genome 1.20e-128
oppA	TR4388	2.00294	0.0001	14.289831584000002	5.34881944542e-32	8.78800201366e-32	up	cd08504, PBP2_OppA, The substrate-binding component of an ABC-type oligopetide import system contains the type 2 periplasmic binding fold. This family represents the periplasmic substrate-binding component of an ATP-binding cassette (ABC)-type oligopeptide transport system comprised of 5 subunits. The transport system OppABCDEF contains two homologous integral membrane proteins OppB and OppF that…	-	K15580-ko02010 ABC transporters;ko02024 Quorum sensing	-	COG4166, OppA, ABC-type oligopeptide transport system, periplasmic component [Amino acid transport and metabolism]. 4.93e-15	GO:0005575, cellular_component;GO:0005623, cell;GO:0030288, outer membrane-bounded periplasmic space;GO:0030313, cell envelope;GO:0031975, envelope;GO:0042597, periplasmic space;GO:0044464, cell part	WP_003224583.1 MULTISPECIES: peptide ABC transporter substrate-binding protein [Bacillus] >KFI04287.1 ABC transporter substrate-binding protein [Bacillus sp. BSC154] >ADM37208.1 oligopeptide ABC transporter (binding lipoprotein) [Bacillus subtilis subsp. spizizenii str. W23] >EFG91370.1 oligopeptide ABC transporter (binding lipoprotein) [Bacillus subtilis subsp. spizizenii ATCC 6633 = JCM 2499] >…	Bacillus subtilis strain FDAARGOS_606 chromosome, complete genome 1.24e-133
nisa	TR2869	172.818	0.51895	8.37944	0	0	up	-	-	K20482-ko02024 Quorum sensing;ko02020 Two-component system	-	-	-	WP_003220055.1 MULTISPECIES: gallidermin/nisin family lantibiotic [Bacillus] >P10946.1 RecName: Full=Lantibiotic subtilin; Flags: Precursor [Bacillus subtilis] >KFI02935.1 lantibiotic nisin-A [Bacillus sp. BSC154] >AAA22772.1 subtilin [Bacillus subtilis] >AAA22778.1 subtilin precursor peptide [Bacillus subtilis subsp. spizizenii ATCC 6633 = JCM 2499] >AAA22840.1 subtilin [Bacillus subtilis] >AAA2…	Bacillus subtilis strain HB1 subtilin S (spaS) gene, complete cds 1.79e-85
gadA/B	TR1903	94.6658	0.651983	7.18187	0	0	up	cd06450, DOPA_deC_like, DOPA decarboxylase family. This family belongs to pyridoxal phosphate (PLP)-dependent aspartate aminotransferase superfamily (fold I). The major groups in this CD correspond to DOPA/tyrosine decarboxylase (DDC), histidine decarboxylase (HDC), and glutamate decarboxylase (GDC). DDC is active as a dimer and catalyzes the decarboxylation of tyrosine. GDC catalyzes the decarbo…	pfam00282, Pyridoxal_deC, Pyridoxal-dependent decarboxylase conserved domain. 1.07e-13	K01580-ko00410 beta-Alanine metabolism;ko00250 Alanine, aspartate and glutamate metabolism;ko02024 Quorum sensing;ko00430 Taurine and hypotaurine metabolism;ko00650 Butanoate metabolism;ko04727 GABAergic synapse	-	COG0076, GadB, Glutamate decarboxylase and related PLP-dependent proteins [Amino acid transport and metabolism]. 2.81e-51	-	WP_215871442.1 MULTISPECIES: glutamate decarboxylase [unclassified Acidithiobacillus] >MBU2753853.1 glutamate decarboxylase [Acidithiobacillus sp. CV18-3] >MBU2757449.1 glutamate decarboxylase [Acidithiobacillus sp. BN09-2] >MBU2777279.1 glutamate decarboxylase [Acidithiobacillus sp. CV18-2] >MBU2789158.1 glutamate decarboxylase [Acidithiobacillus sp. VAN18-1] >MBU2796238.1 glutamate decarboxylas…	Acidithiobacillus sp. YTS05 chromosome, complete genome 0.0
